# Supplementary material for: Chemoselective preparation of 1,2,3-triazole–isoxazole bisfunctional derivatives and their application in peptidomimetic synthesis
Source: Royal Society of Chemistry journal article supplement (doi:10.1039/c2ob26990b), 2012-11-29

# Chemoselective Preparation of 1,2,3-triazole and Isoxazoles Bisfunctional Derivatives and Its Application in Peptidomimetic Synthesis

Teng-fei Niu<sup>a</sup>, Mei-fang Lv<sup>a</sup>, Liang wang<sup>b</sup>, Wen-bin Yi<sup>a</sup>, and Chun Cai<sup>a\*</sup>

<sup>a</sup>Chemical Engineering College, Nanjing University of Science and Technology, Nanjing, 210094, P. R. China.

<sup>b</sup>Jiangsu Province Key Laboratory of Fine Petrochemical Engineering, Changzhou University, Changzhou 213164, P. R. China

## Crystallographic data

Crystallographic data of complexes **6a** was collected at 296 K on a Bruker SMART CCD system equipped with graphite-monochromated Mo-K $\alpha$  radiation ( $\lambda = 0.071073$  nm) using  $\omega$ - $\phi$  scan technique. Diffraction data were integrated by the SAINT program, which was also used for intensity corrections for Lorentz and polarization effects. Semi-empirical absorption correction was applied using SADABS. The structures were solved by direct methods and all non-hydrogen atoms were refined anisotropically on  $F^2$  by full-matrix least-squares using the SHELXL-97 crystallographic software package

| complex                                | <b>1</b>                                                        |
|----------------------------------------|-----------------------------------------------------------------|
| Formula                                | C <sub>20</sub> H <sub>16</sub> ClN <sub>5</sub> O <sub>2</sub> |
| Formula weight                         | 393.83                                                          |
| Crystal system                         | Monoclinic                                                      |
| space group                            | <i>P2(1)/C</i>                                                  |
| a (Å)                                  | 17.877(6)                                                       |
| b (Å)                                  | 9.516(3)                                                        |
| c (Å)                                  | 10.966(3)                                                       |
| $\alpha$ (°)                           | 90.00                                                           |
| $\beta$ (°)                            | 91.469(5)                                                       |
| $\gamma$ (°)                           | 90.00                                                           |
| Volume(Å <sup>3</sup> )                | 1864.8(10)                                                      |
| Z                                      | 4                                                               |
| T, (K)                                 | 296(2)                                                          |
| $\mu$ (mm <sup>-1</sup> )              | 0.232                                                           |
| D <sub>calcd</sub> (g/m <sup>3</sup> ) | 1.403                                                           |

|                        |                     |
|------------------------|---------------------|
| F(000)                 | 816                 |
| Reflections            | 3218                |
| collected              |                     |
| Unique                 | 2358                |
| reflections            |                     |
| Goof                   | 1.025               |
| $R_1[I > 2\sigma(I)]$  | 0.0582              |
| $wR_2[I > 2\sigma(I)]$ | 0.1813 <sup>a</sup> |

---

<sup>a</sup>  $w = 1/[\sigma^2(F_0)^2 + (0.1404P)^2 + 0.0000P]$ , where  $P = (F_0^2 + 2F_c^2)/3$

## Copies of <sup>1</sup>H and <sup>13</sup>C spectra of 6, 13, 14,15

6a

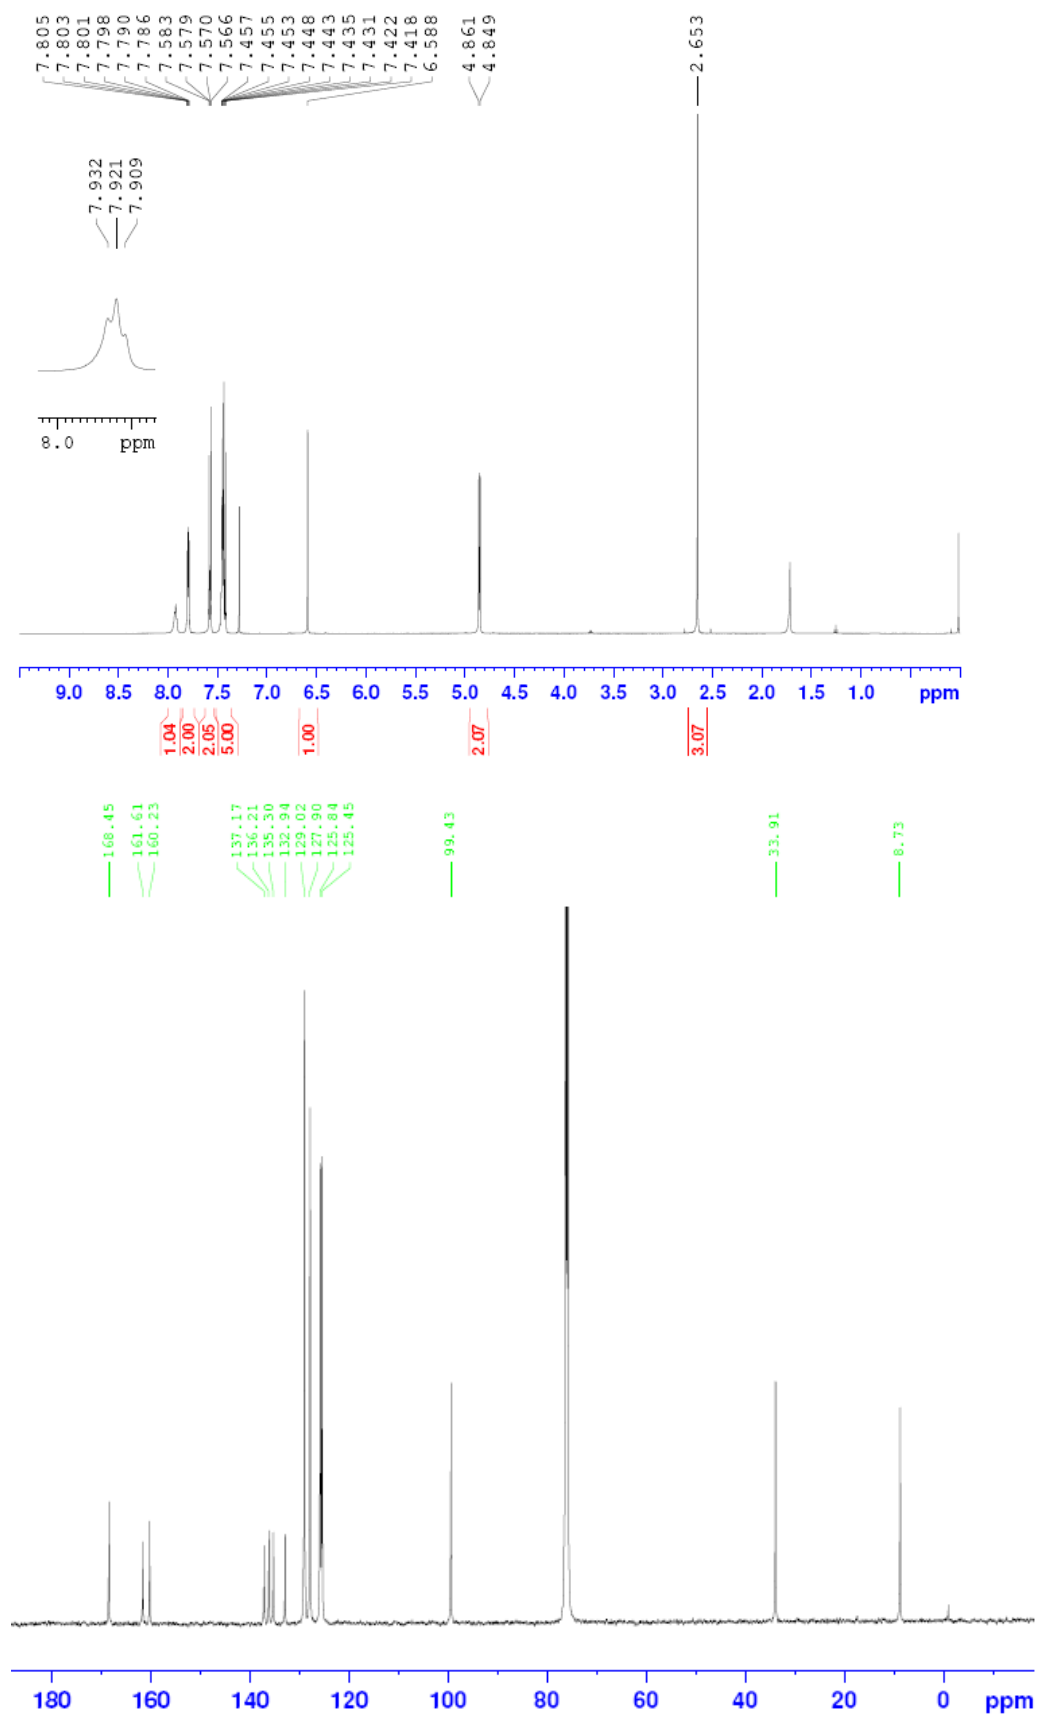

6b

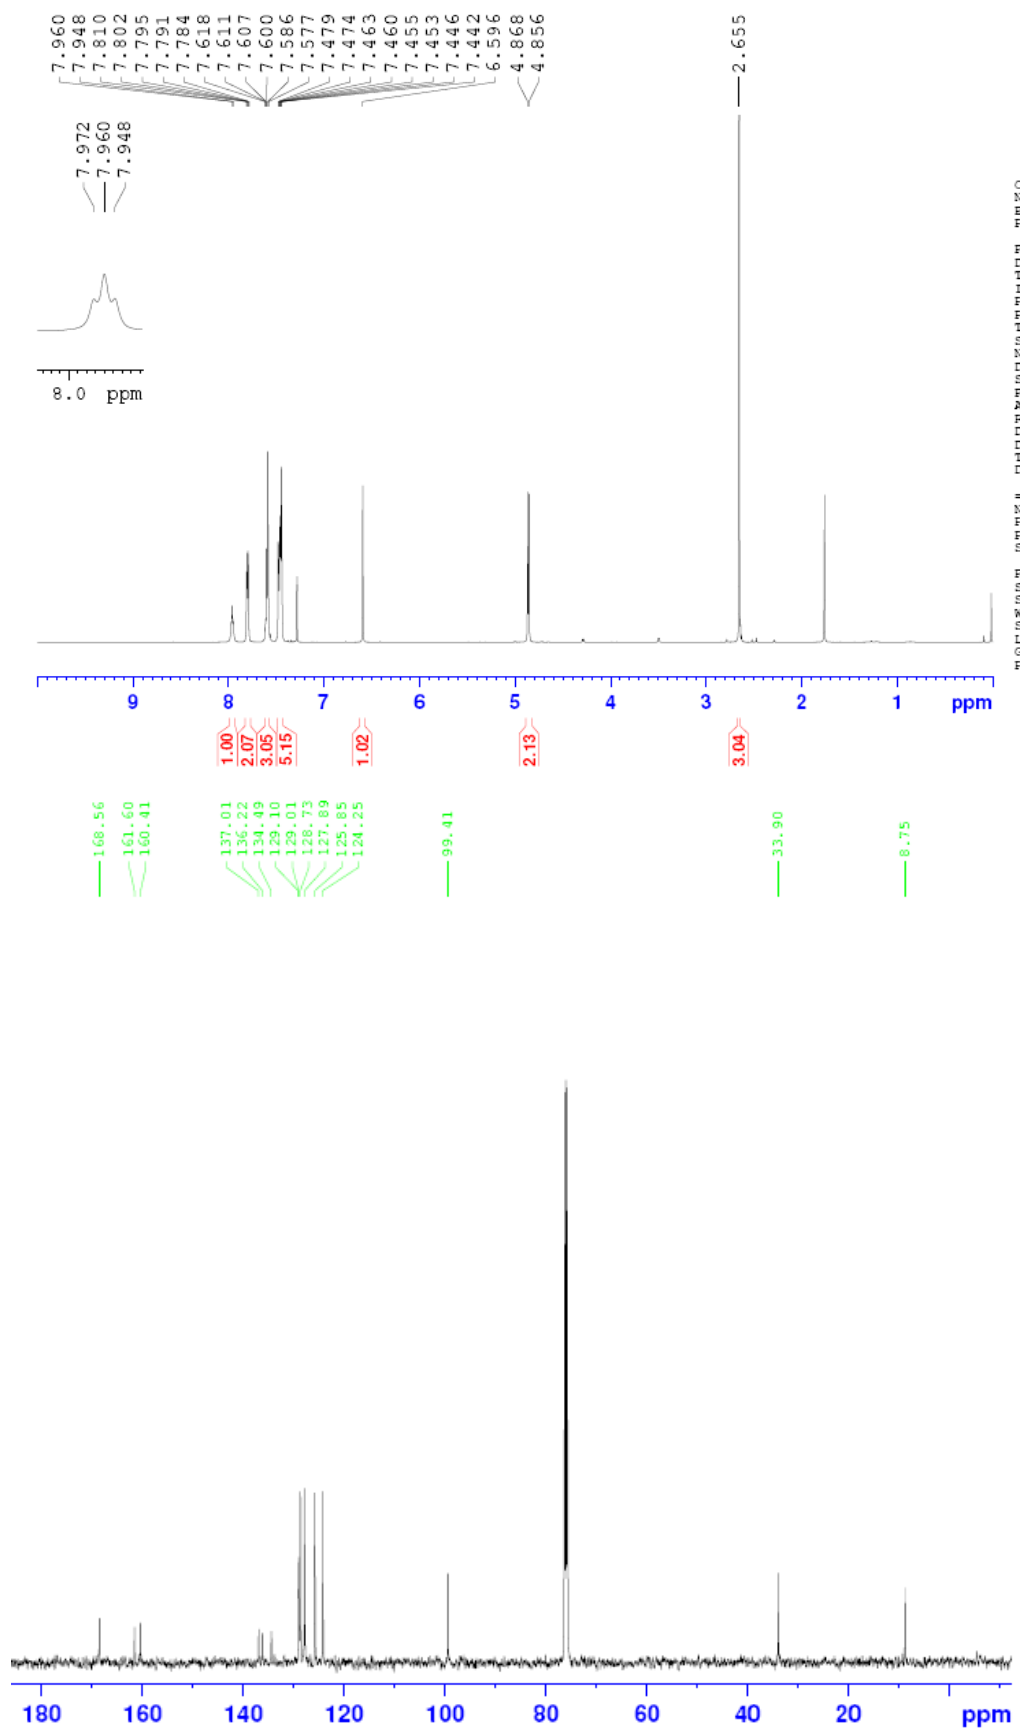

6c

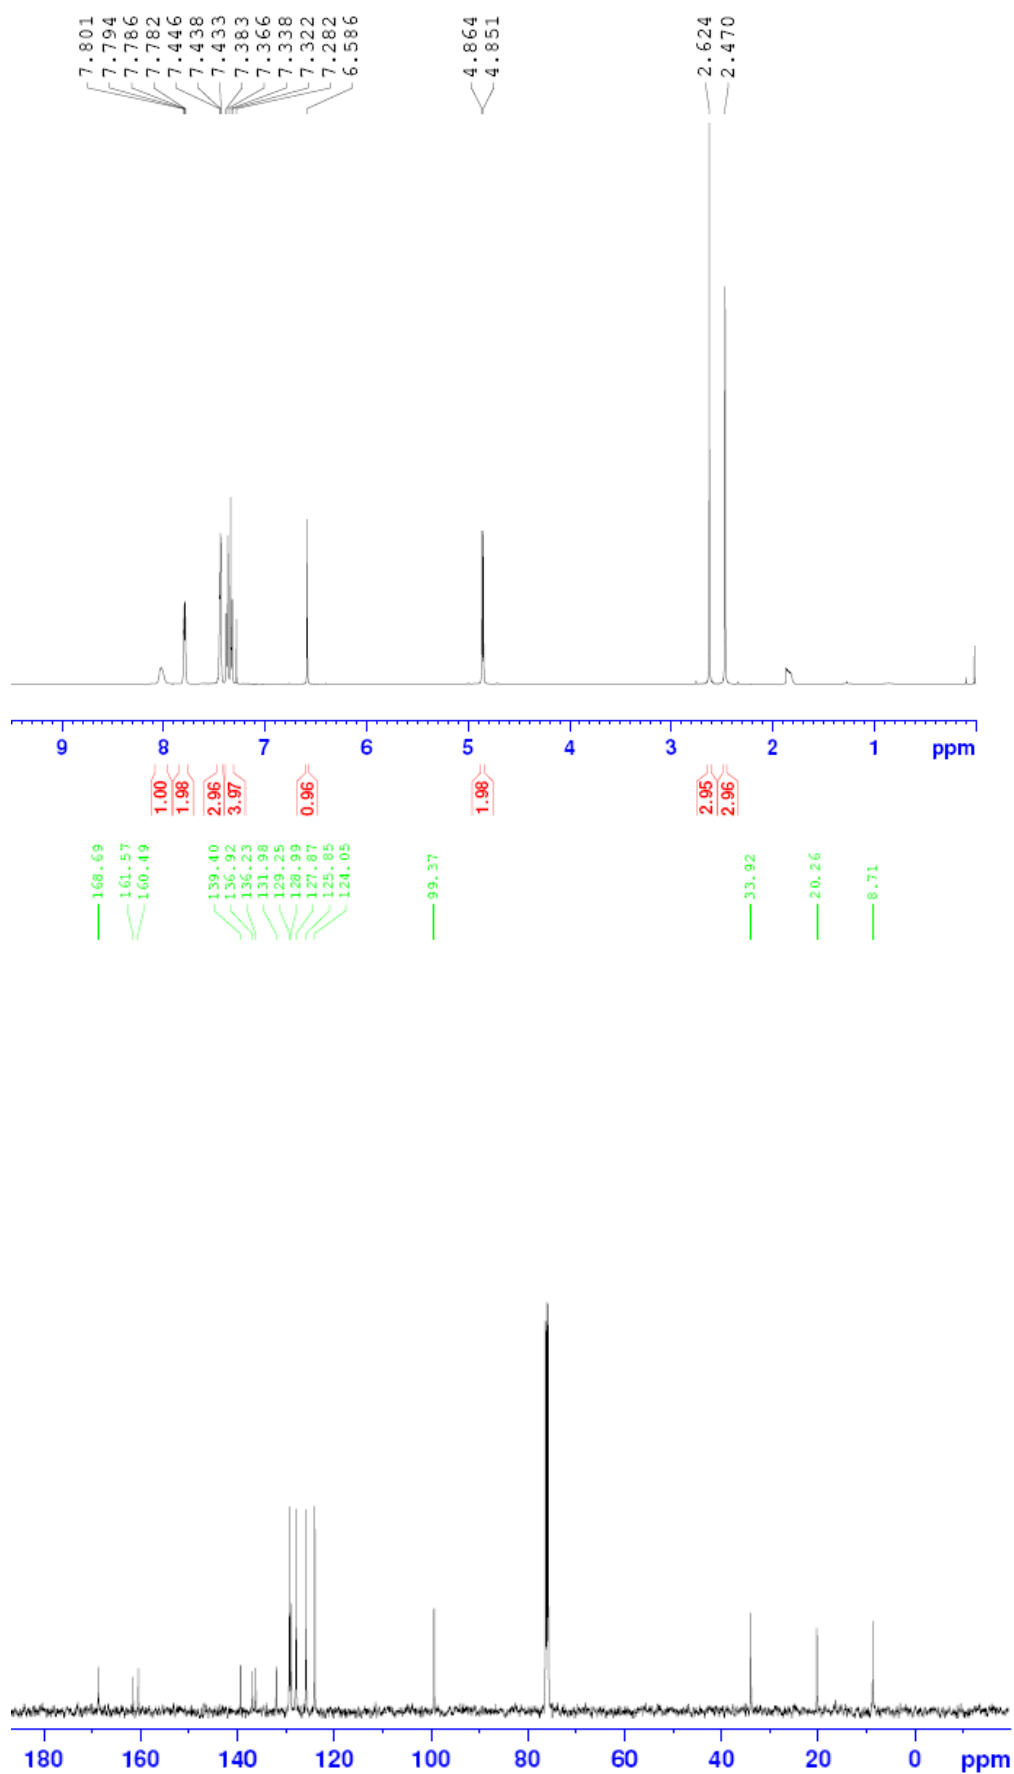

6d

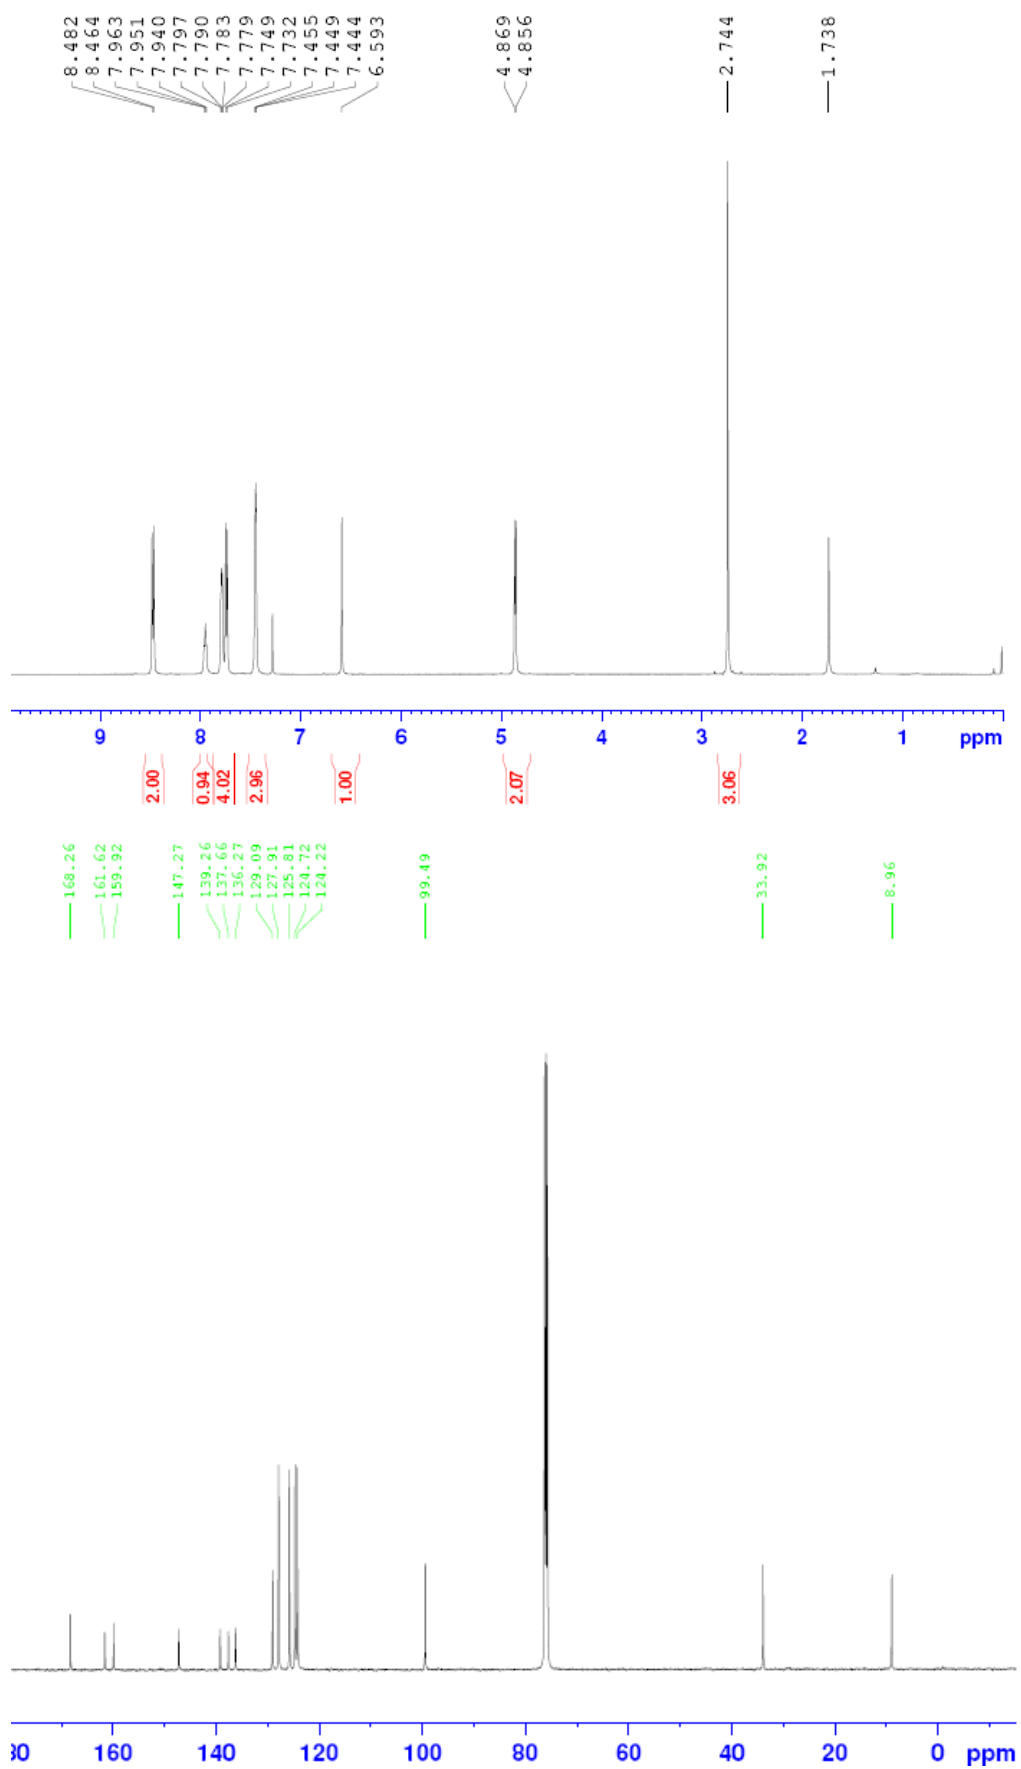

6e

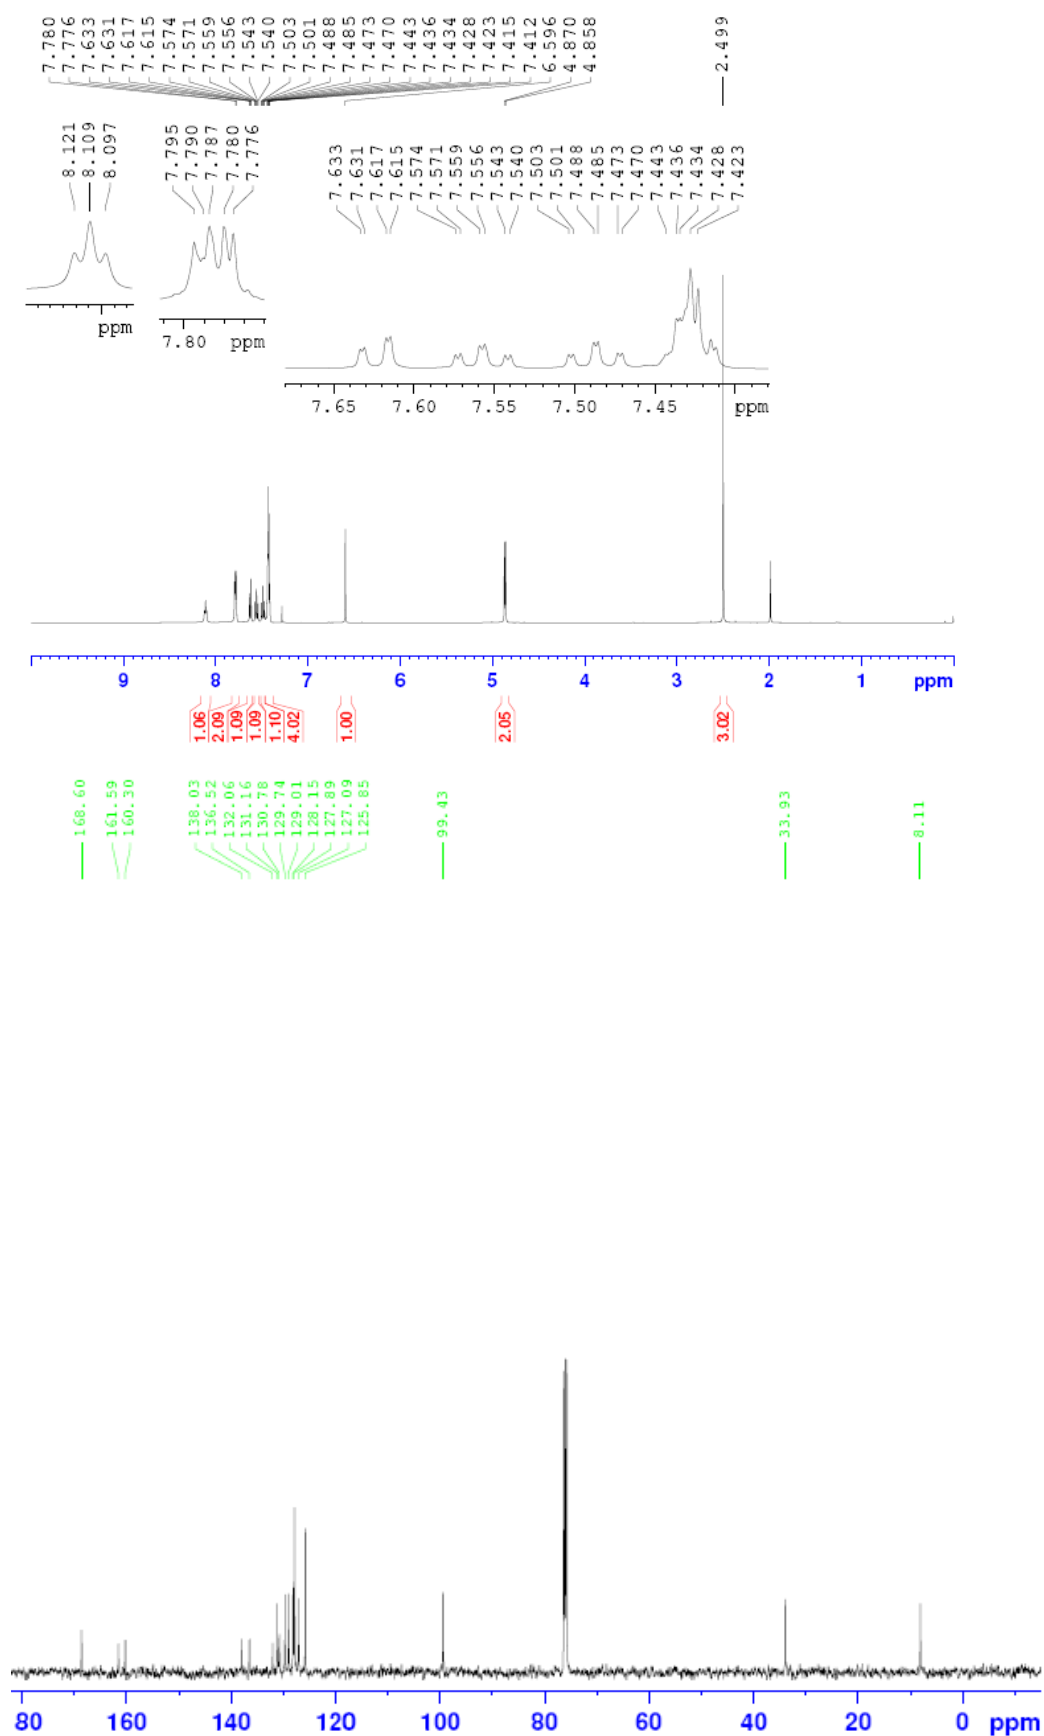

6f

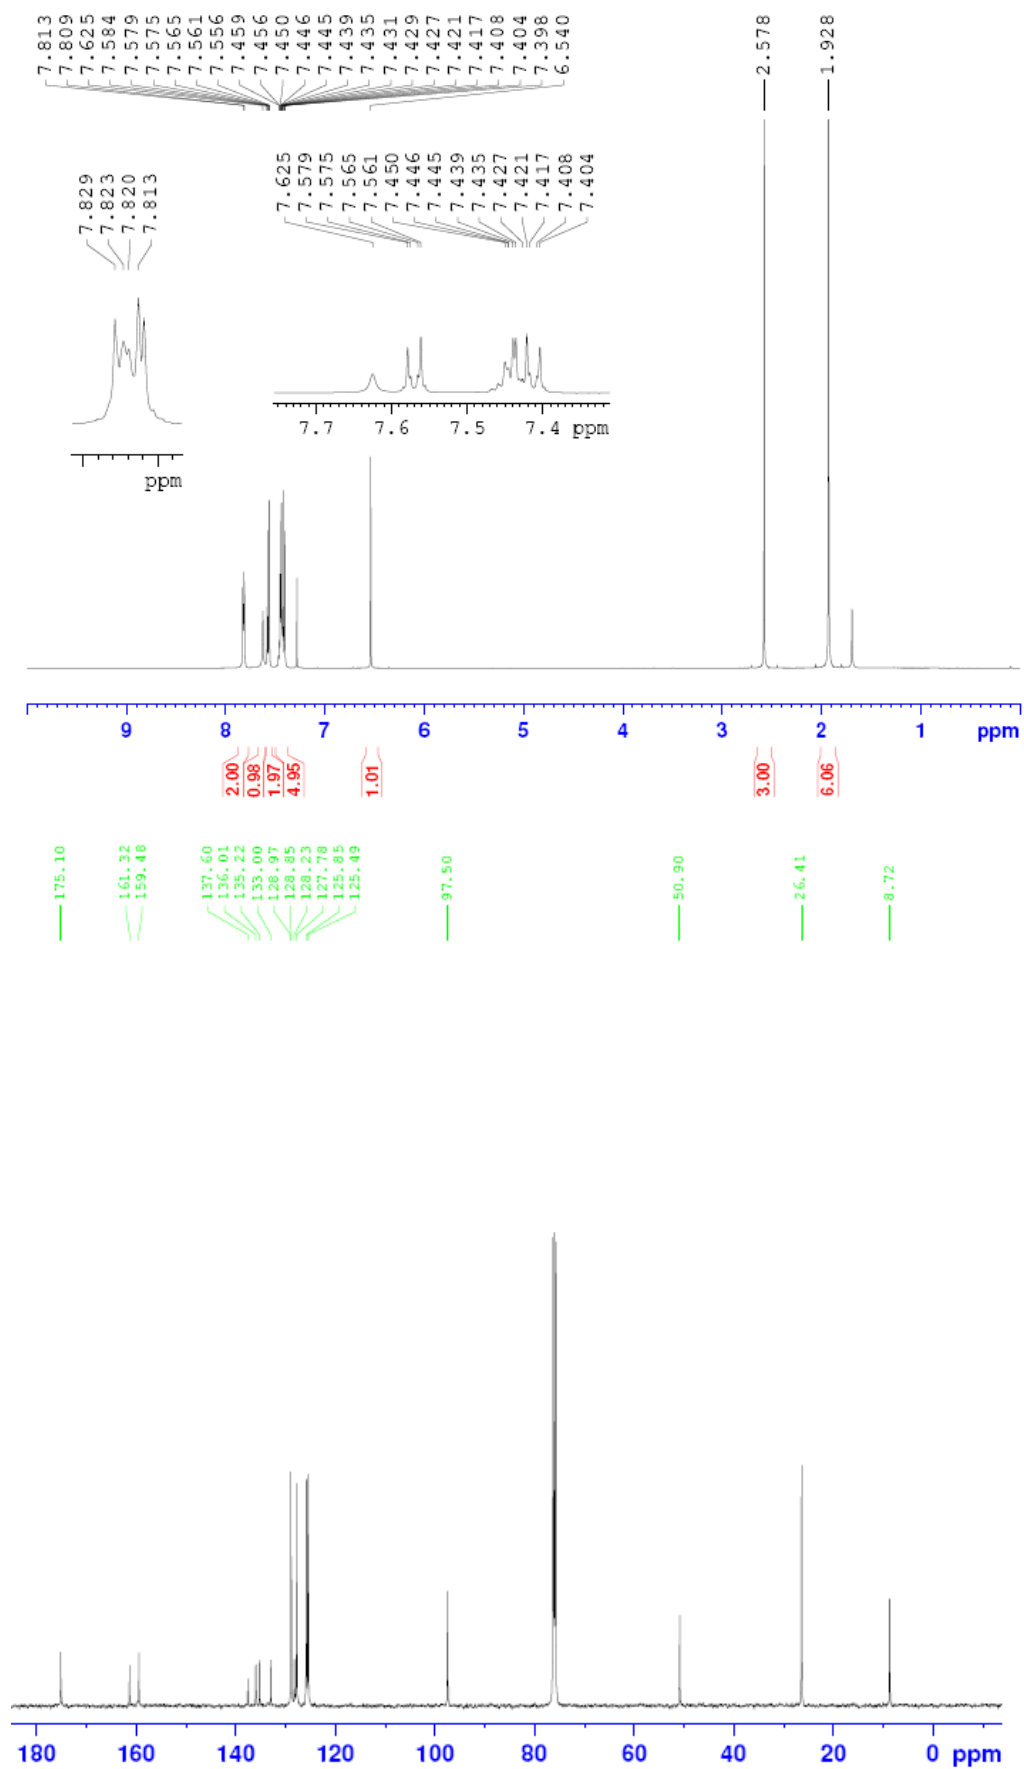



6g

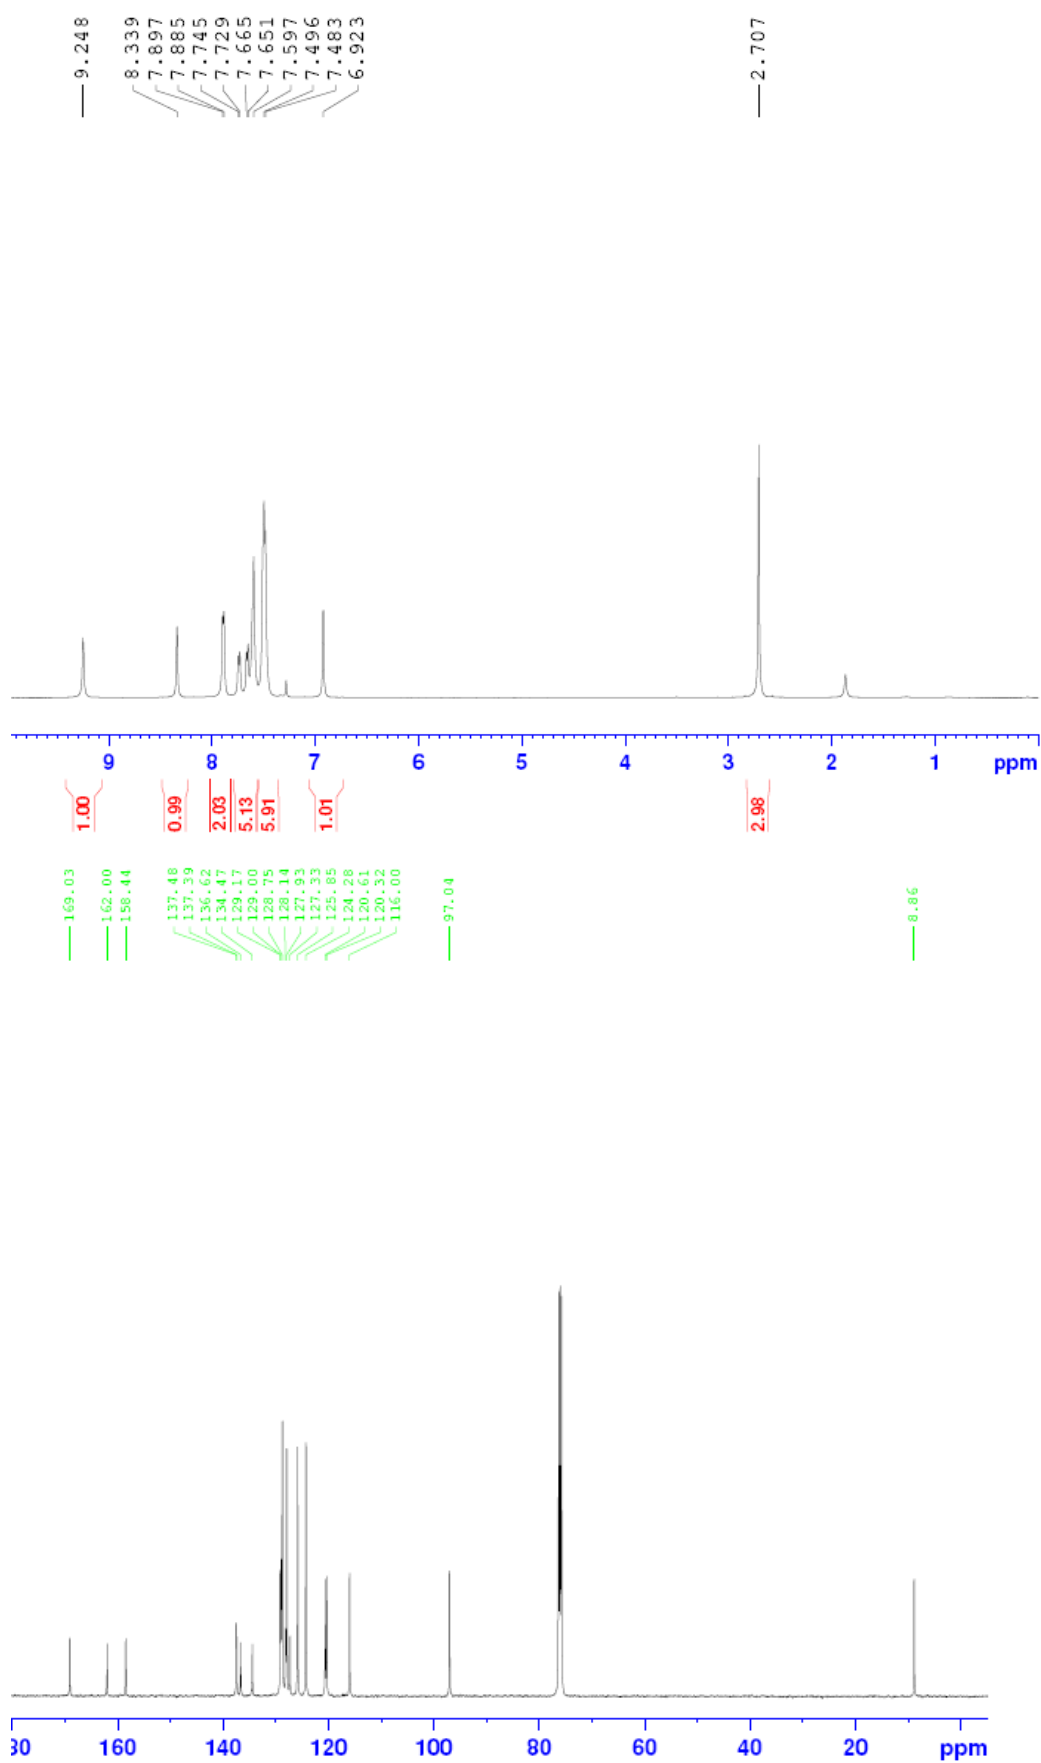

6h

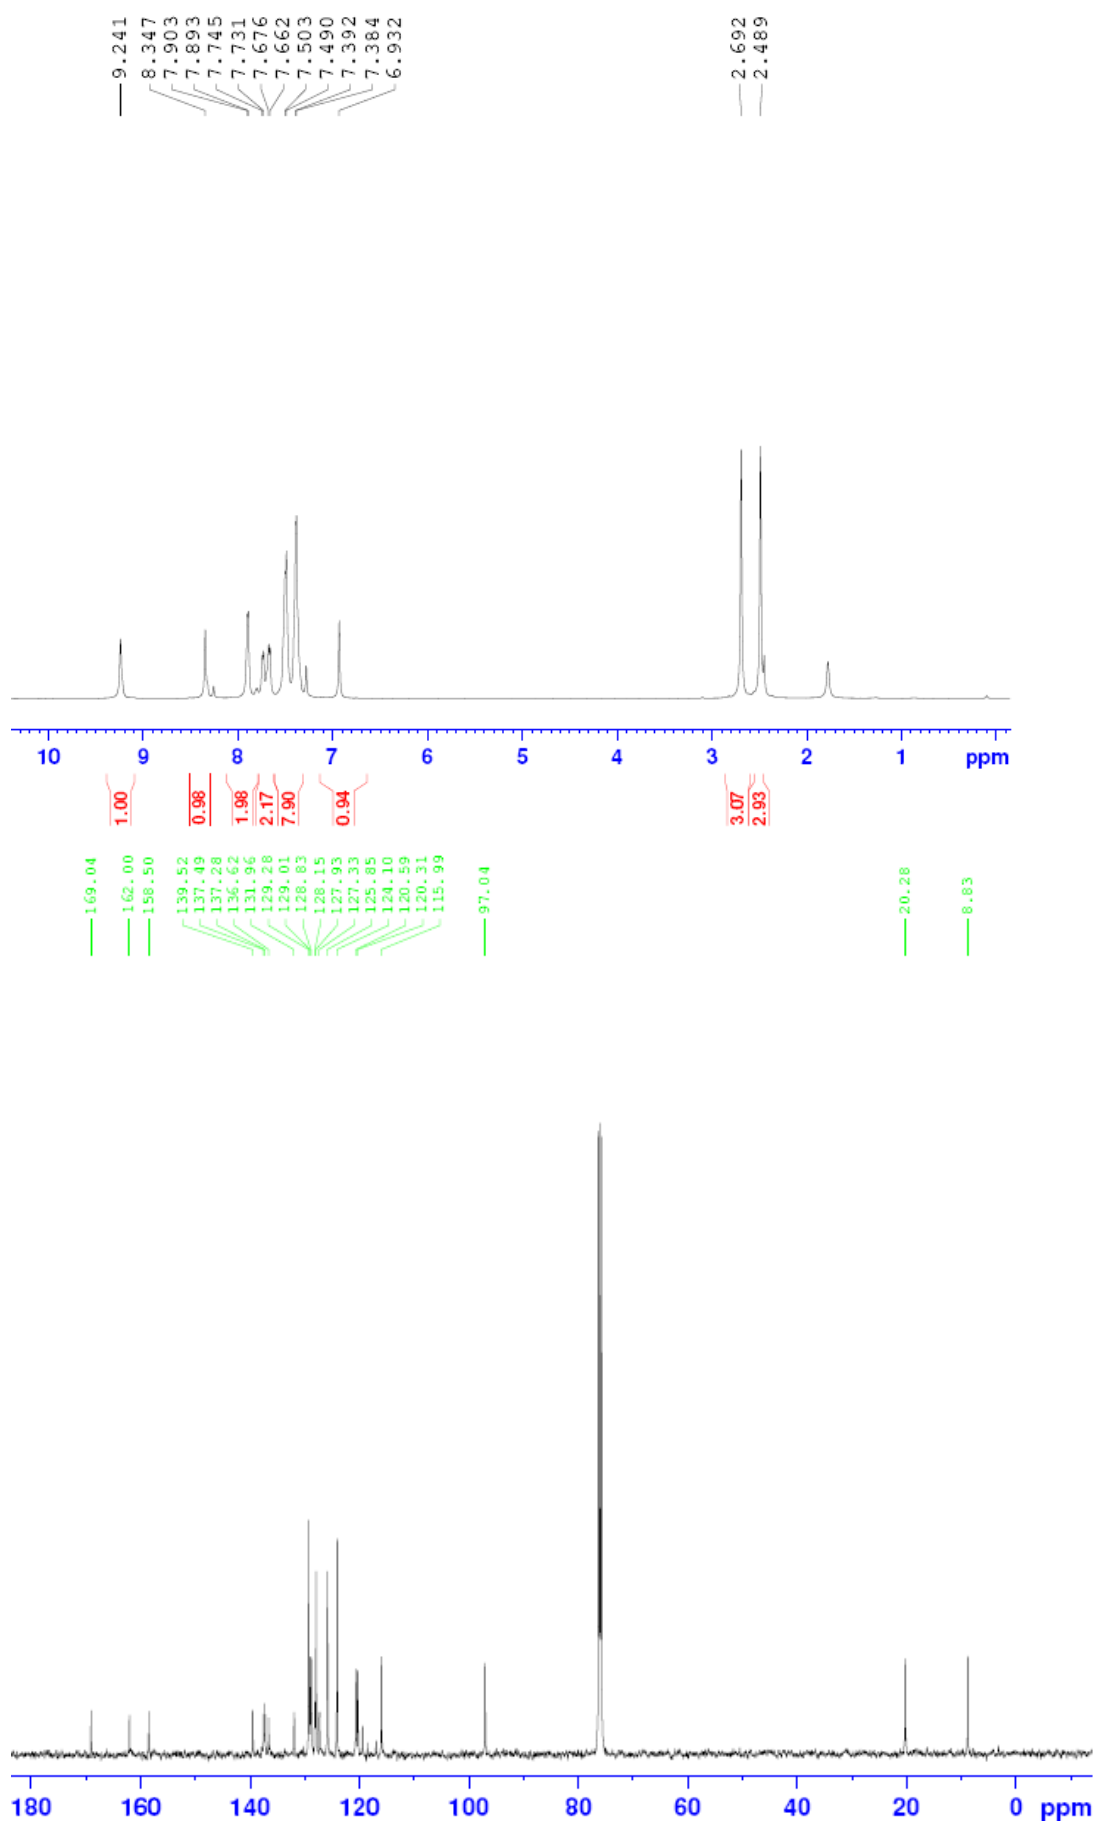

6i

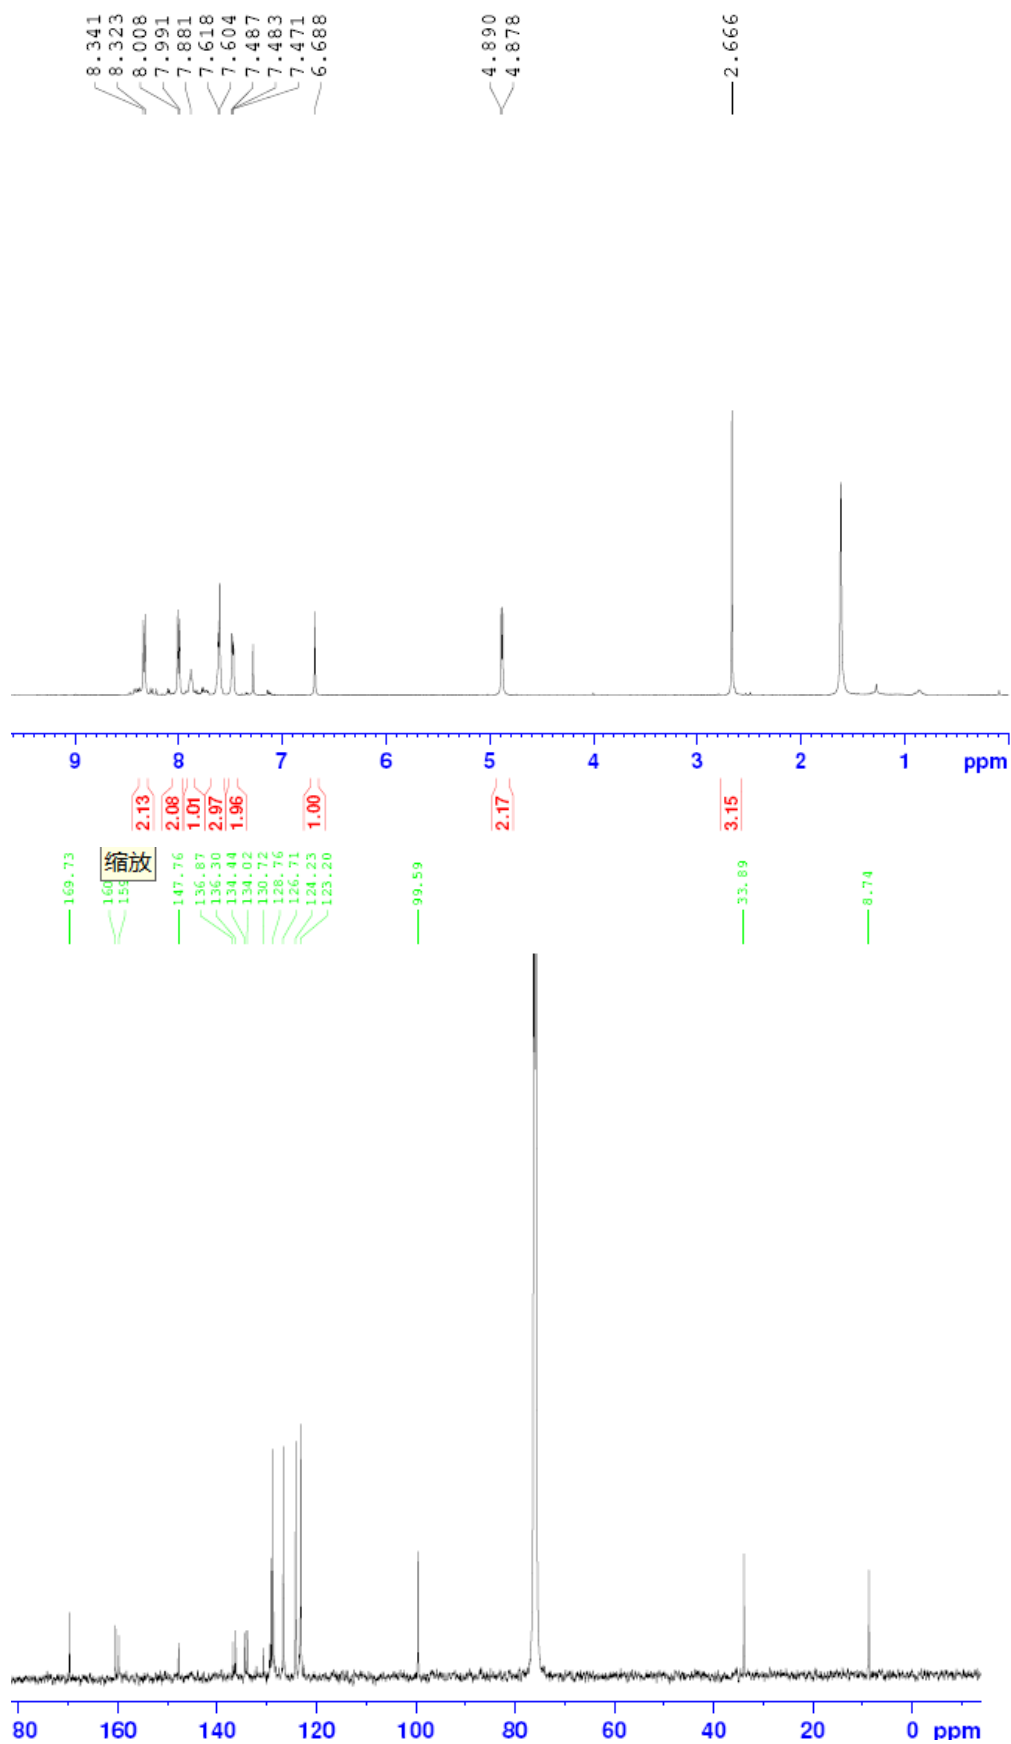

6j

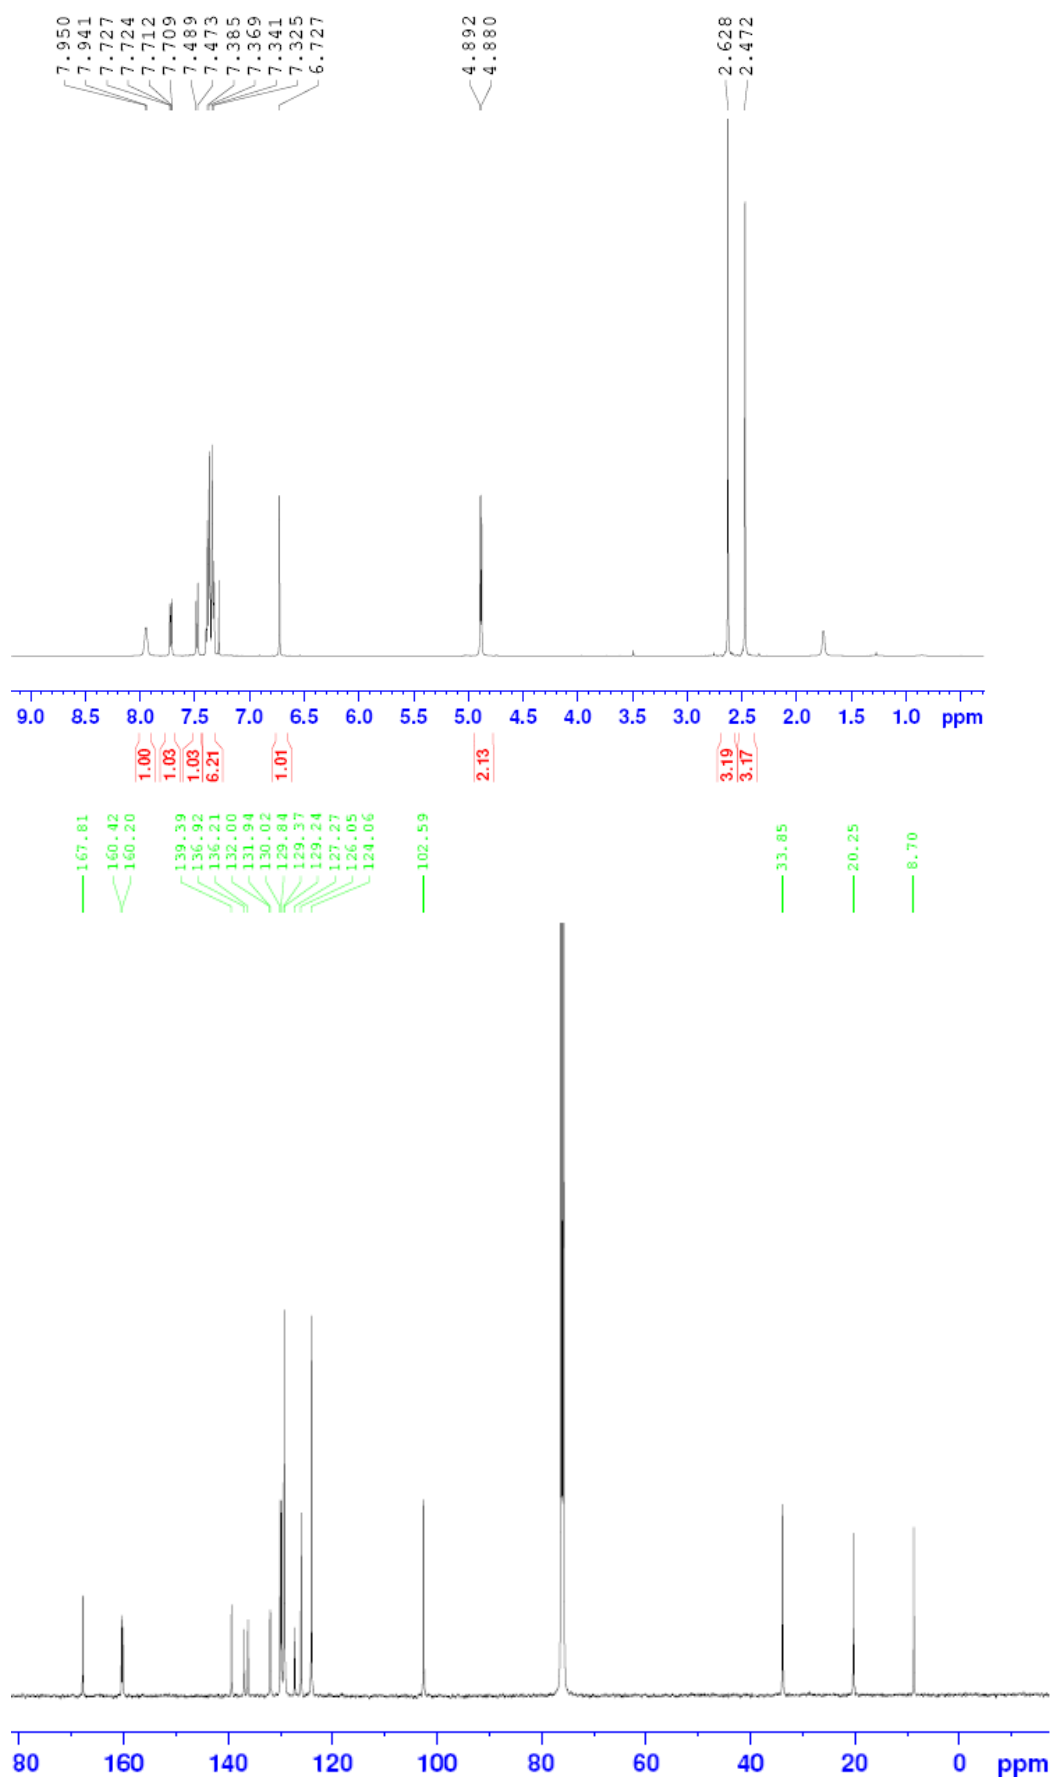

13a

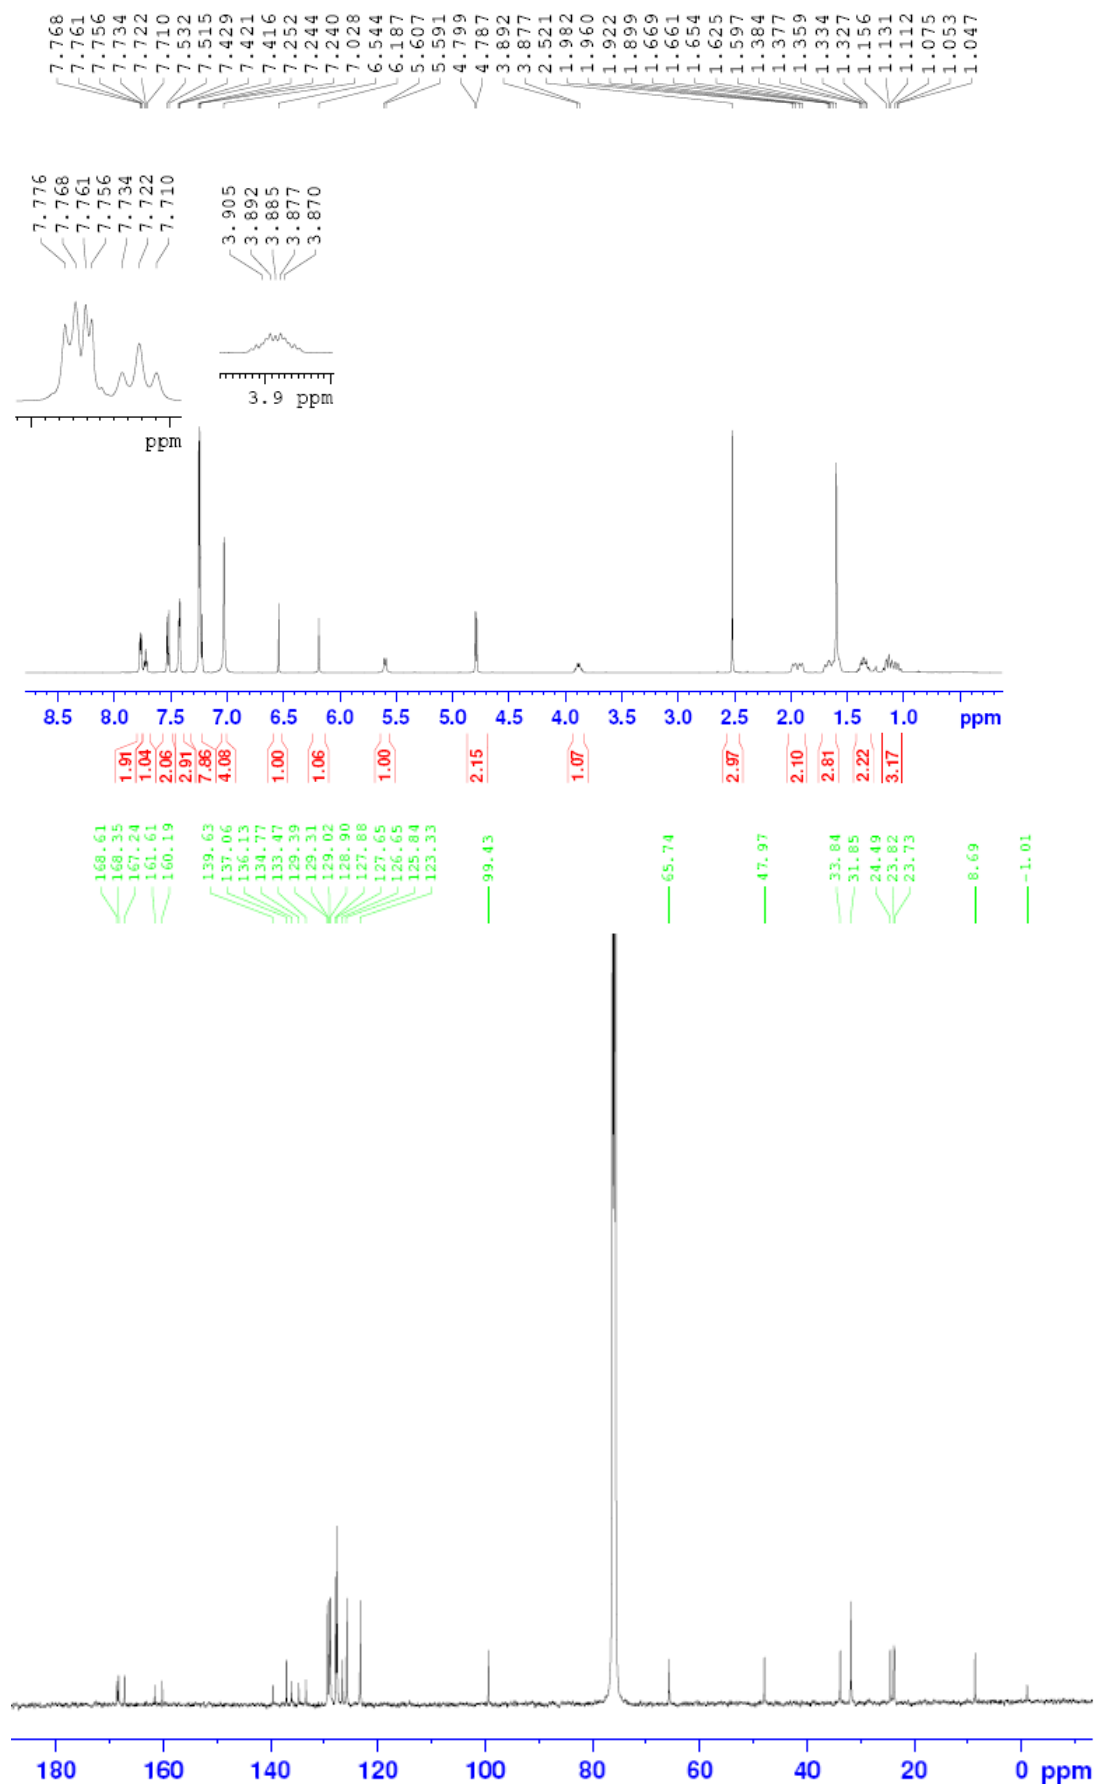

13b

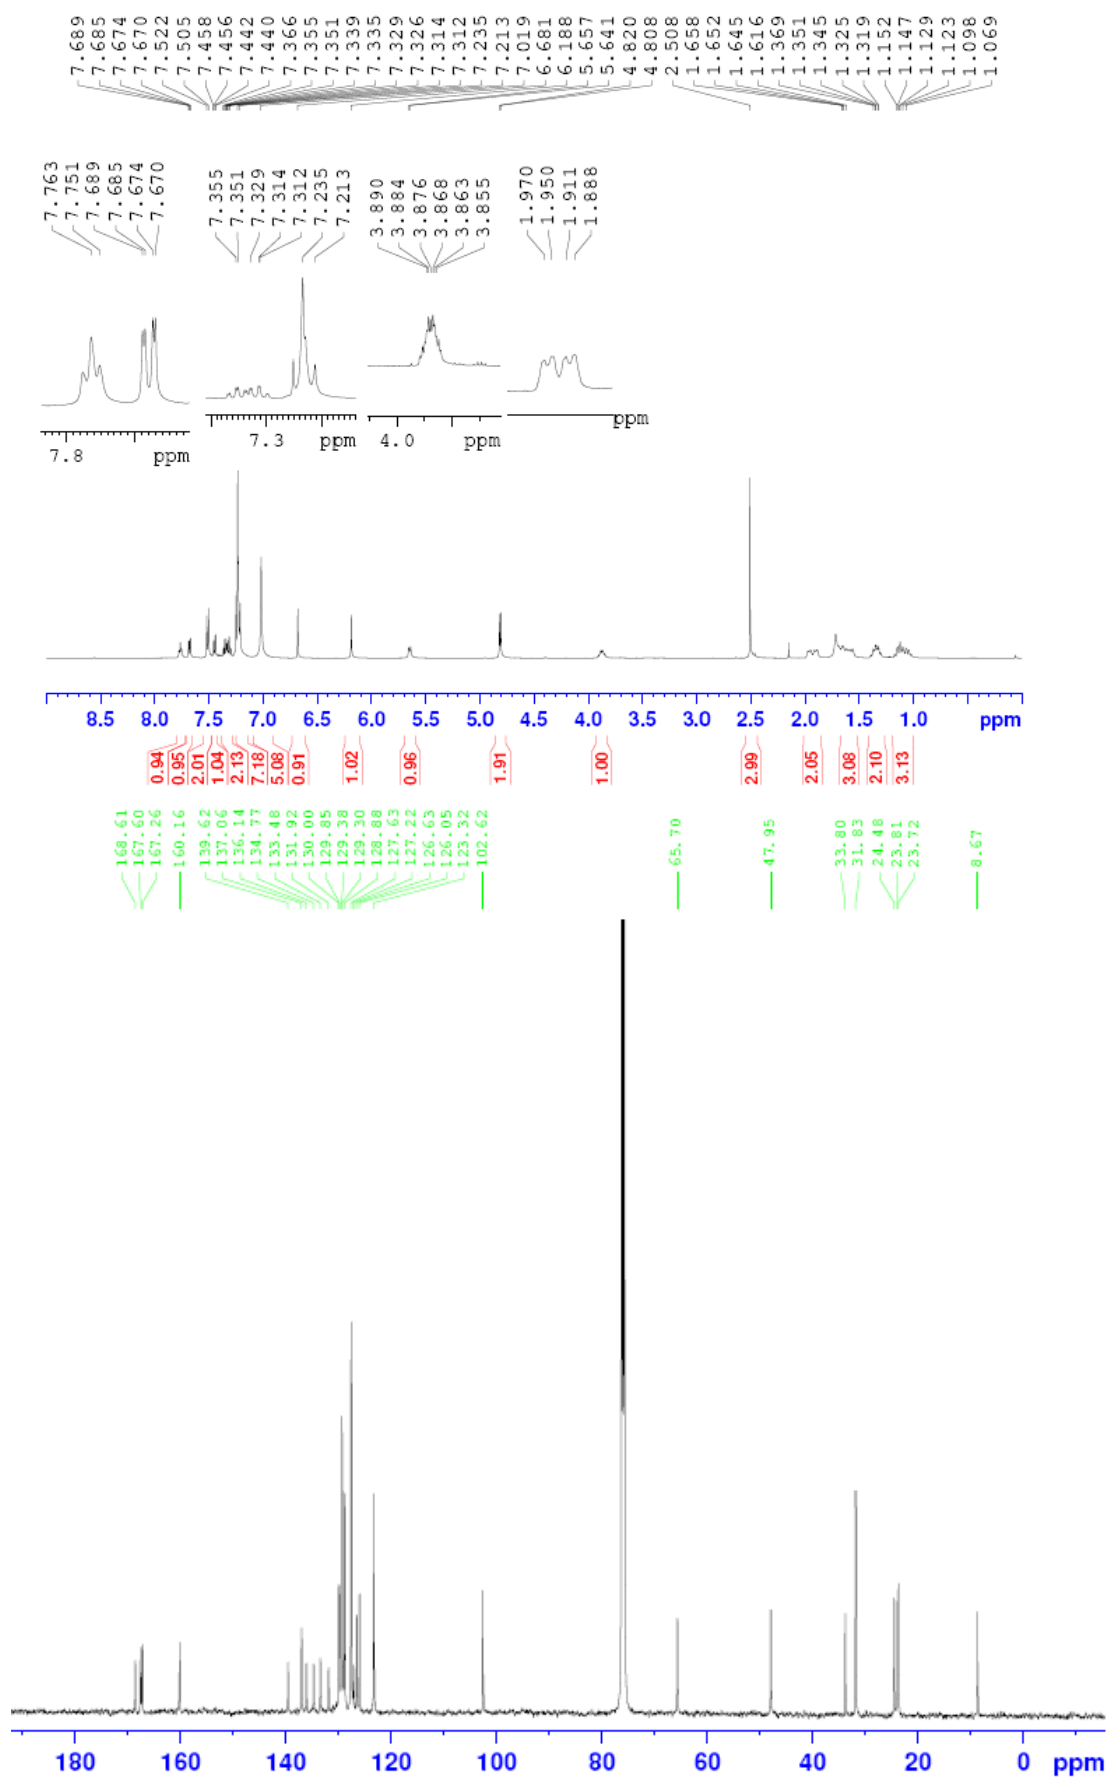

13c

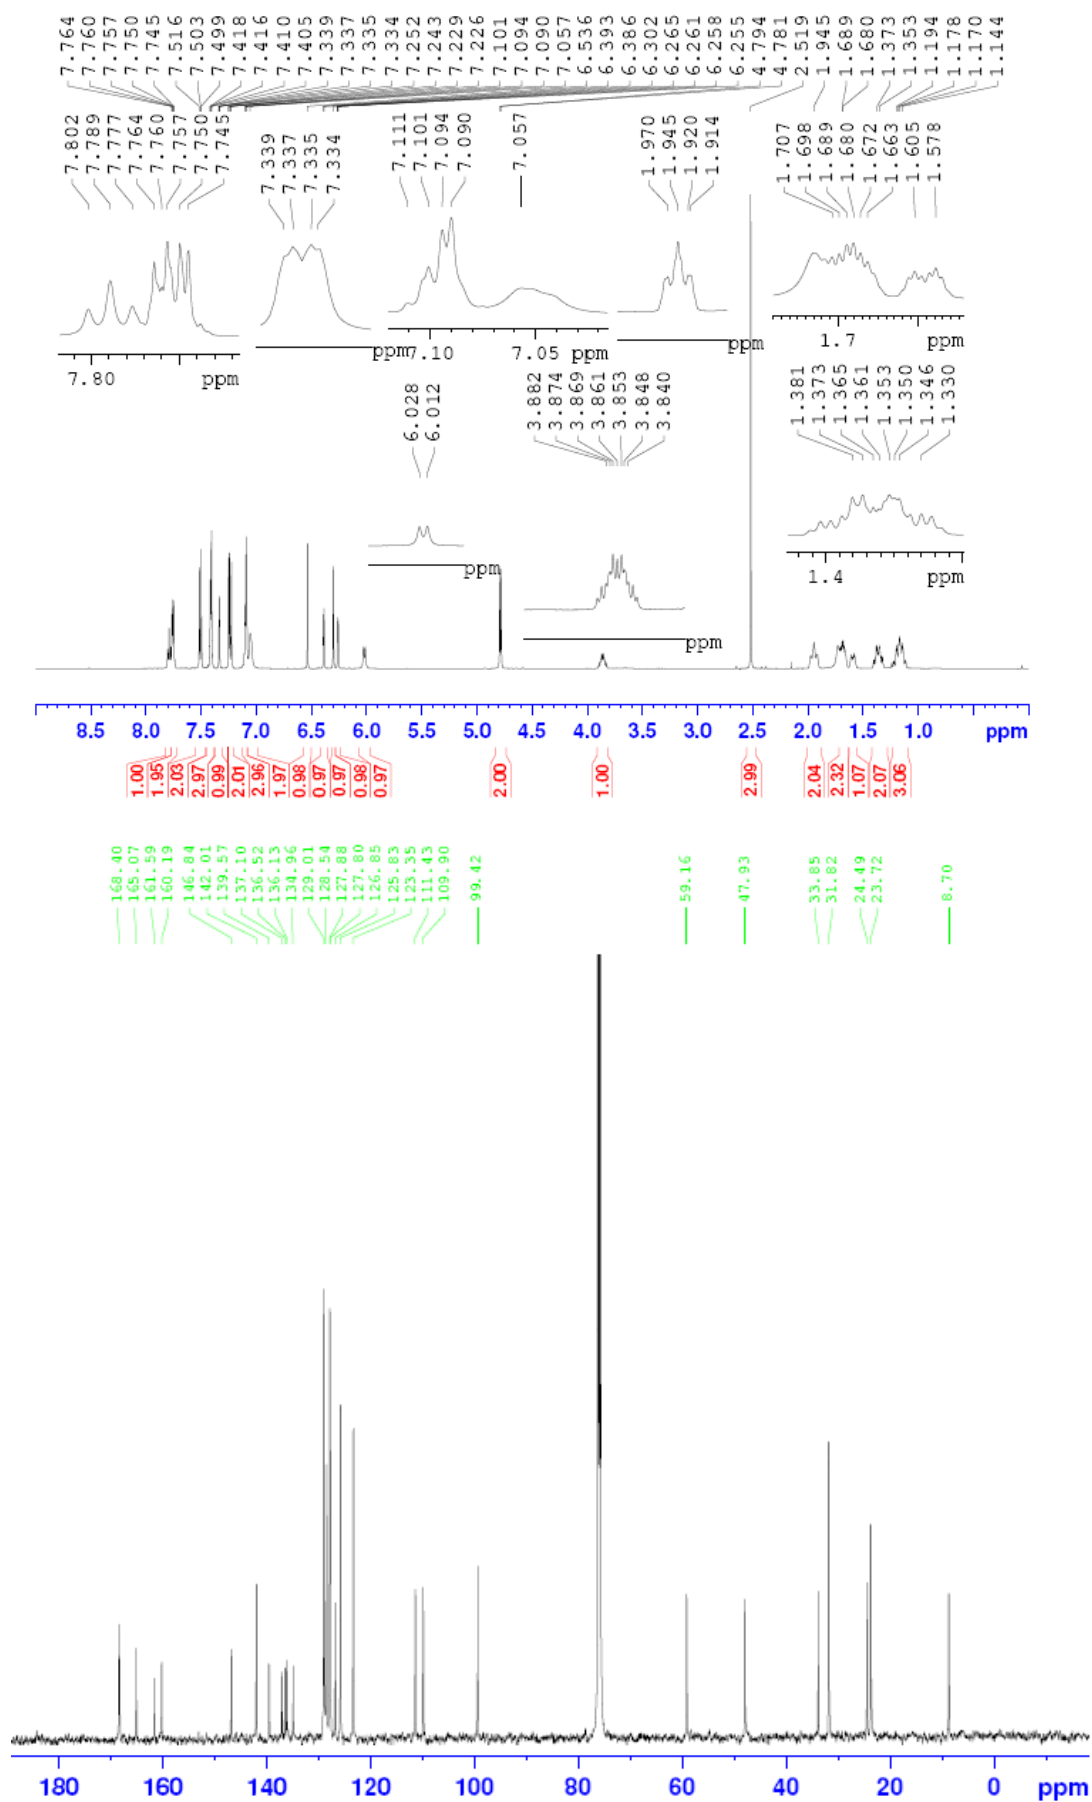

13d

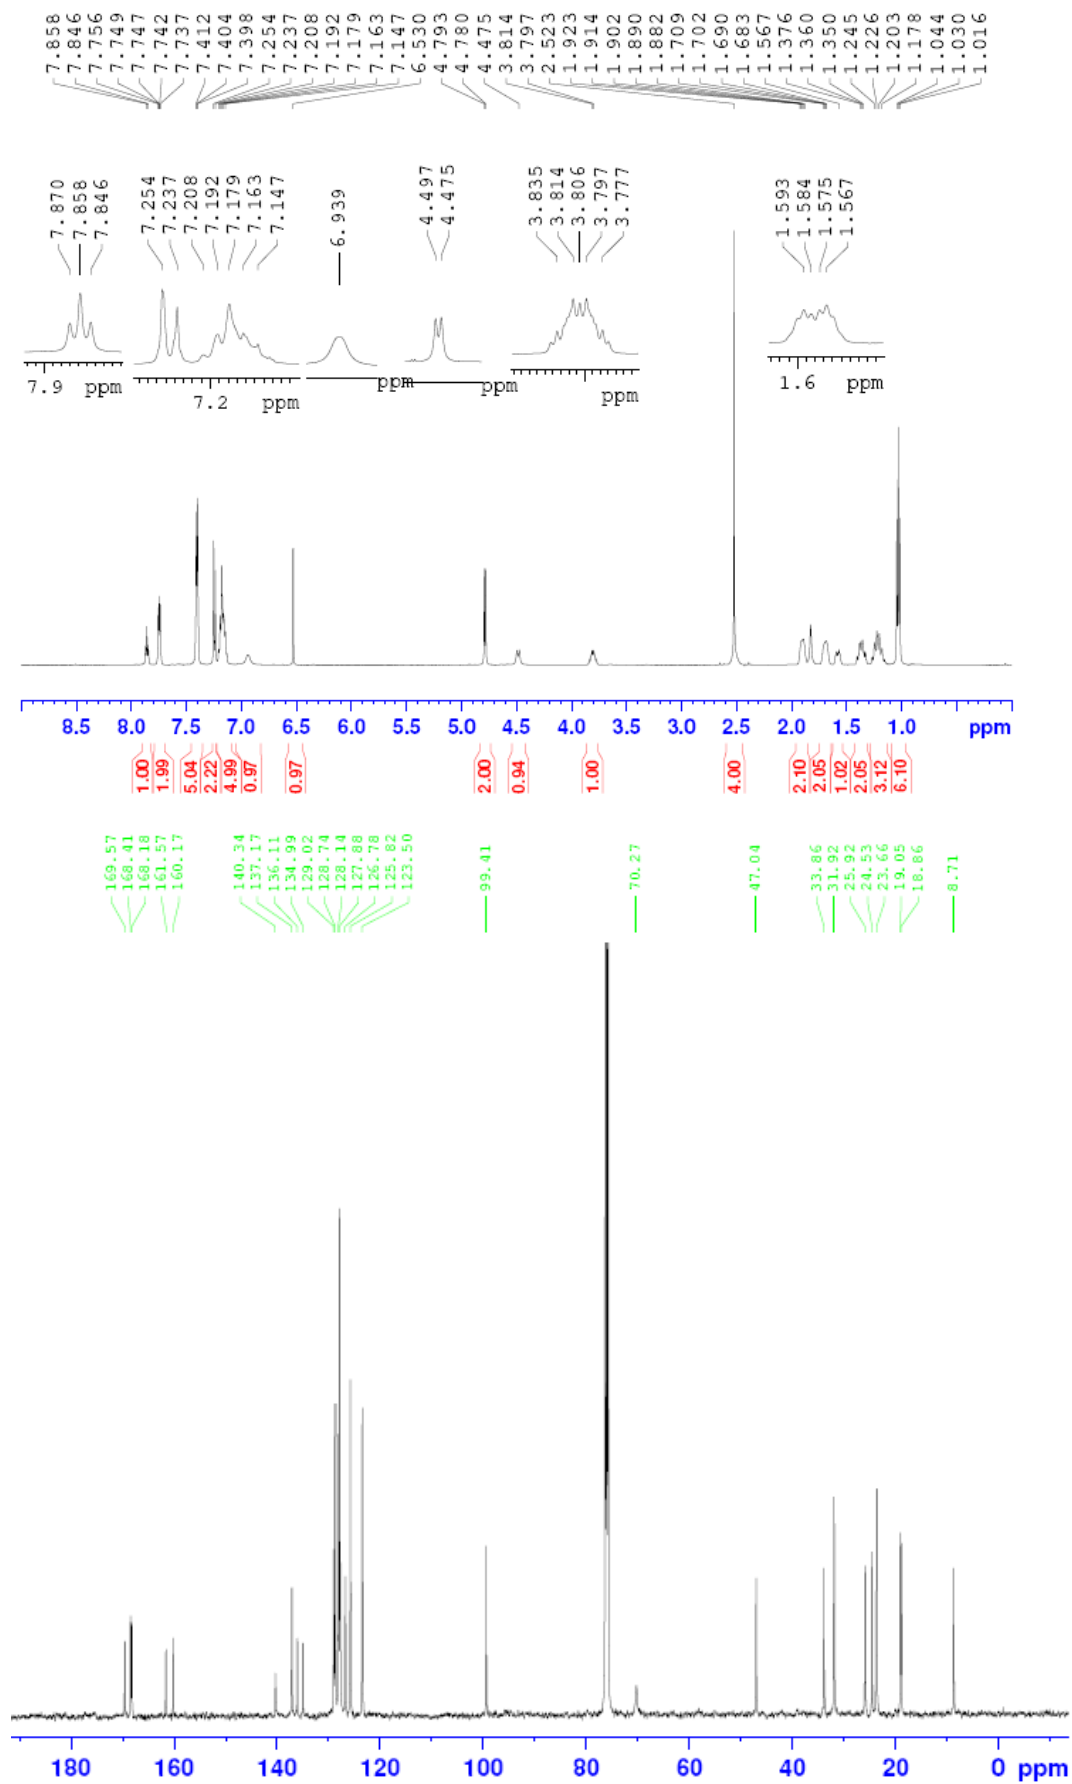



14a

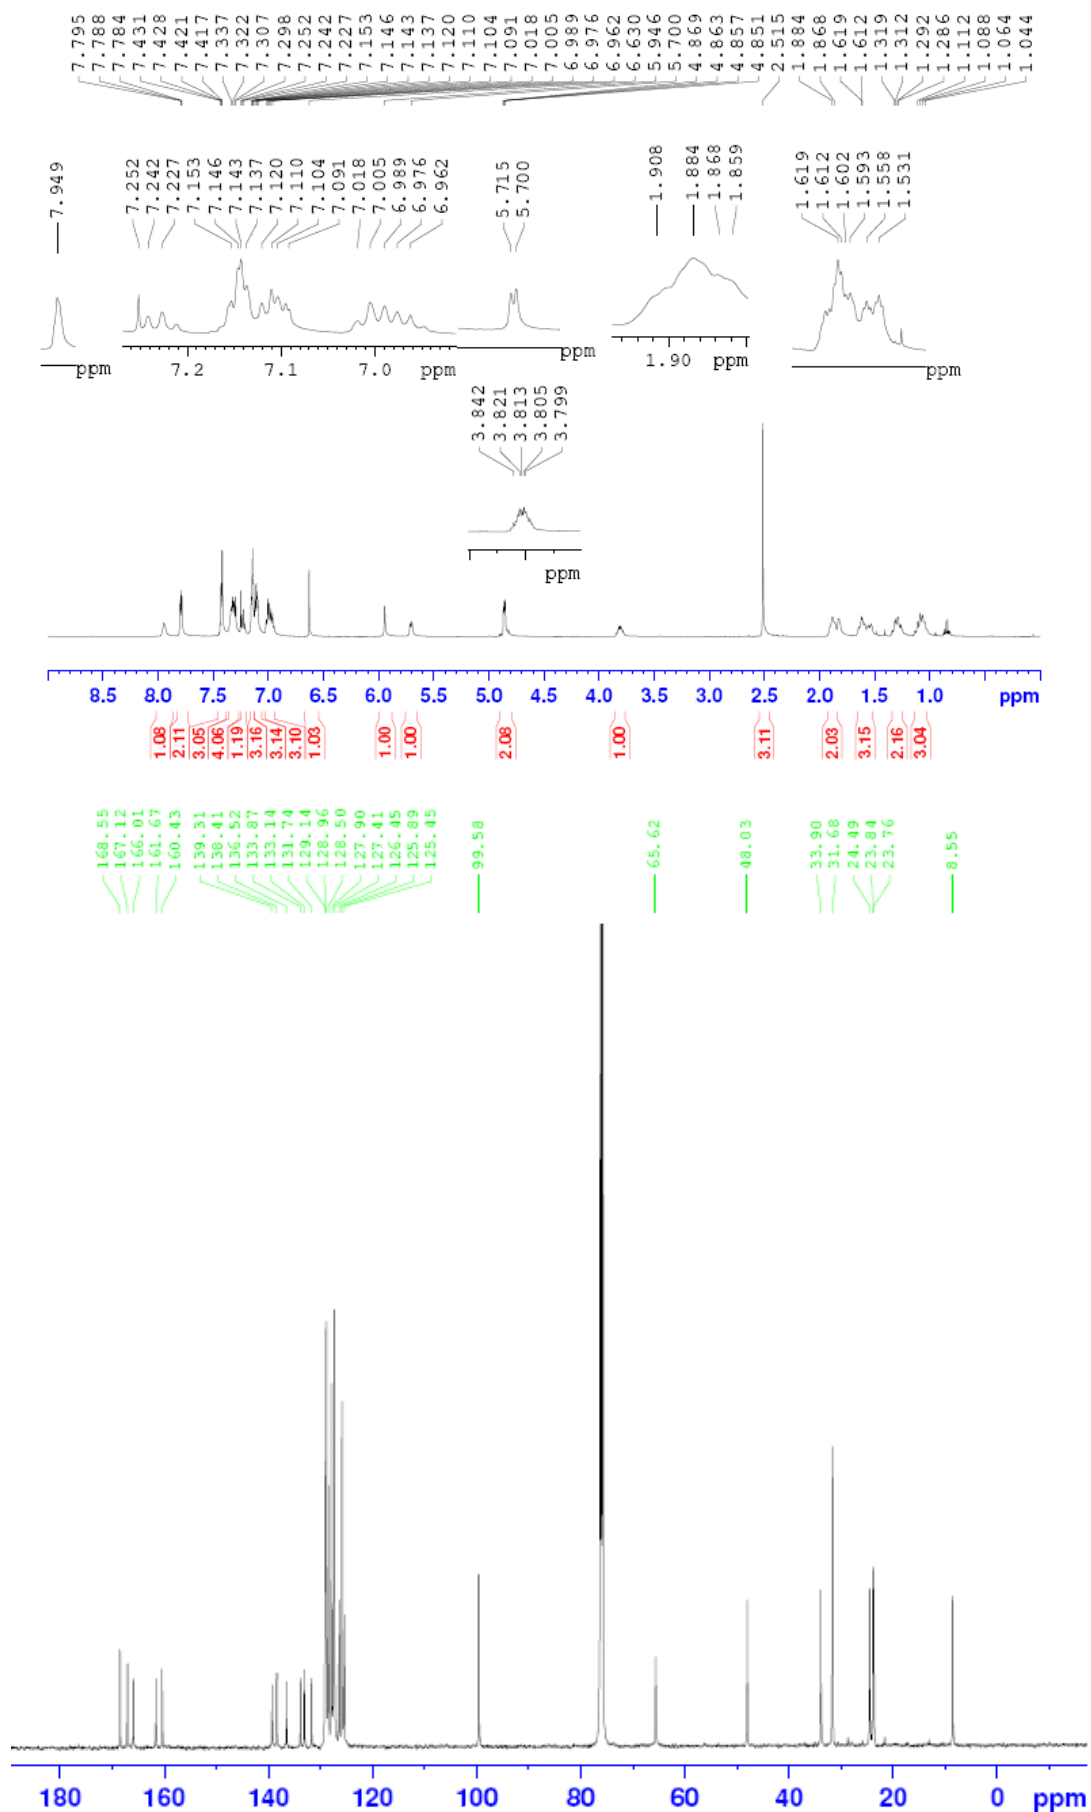

15a

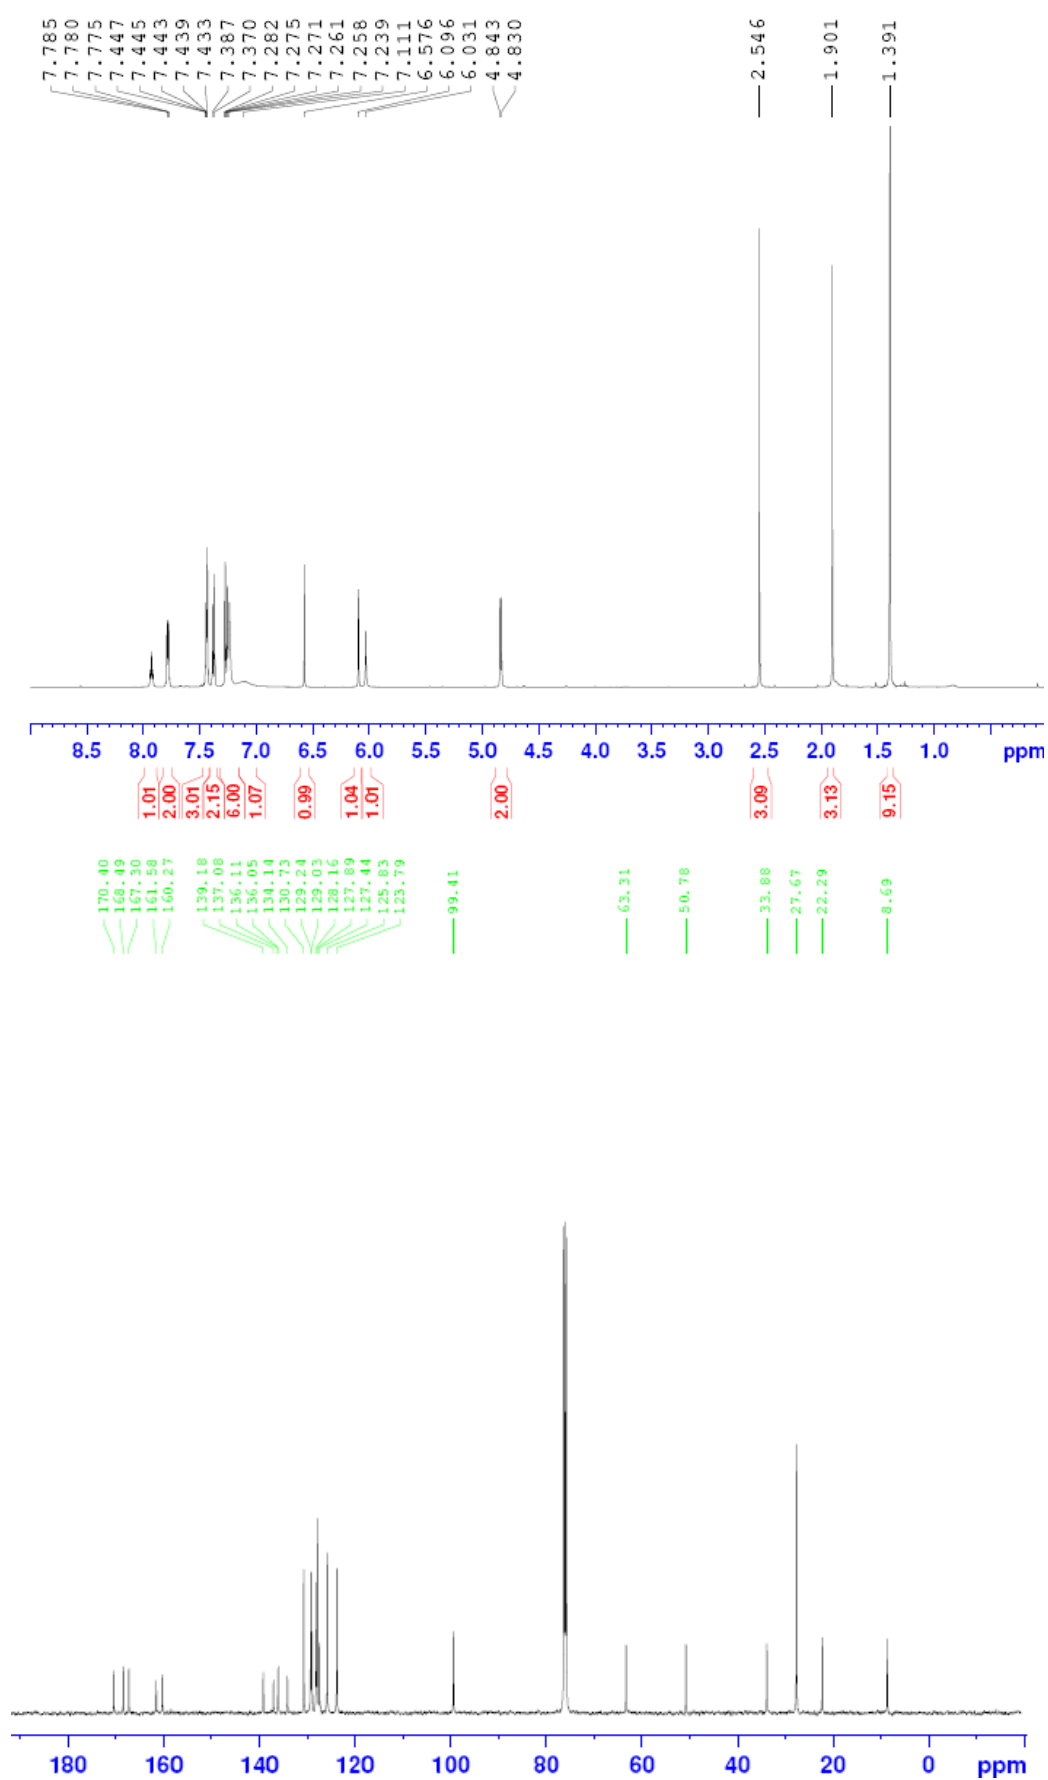

15b

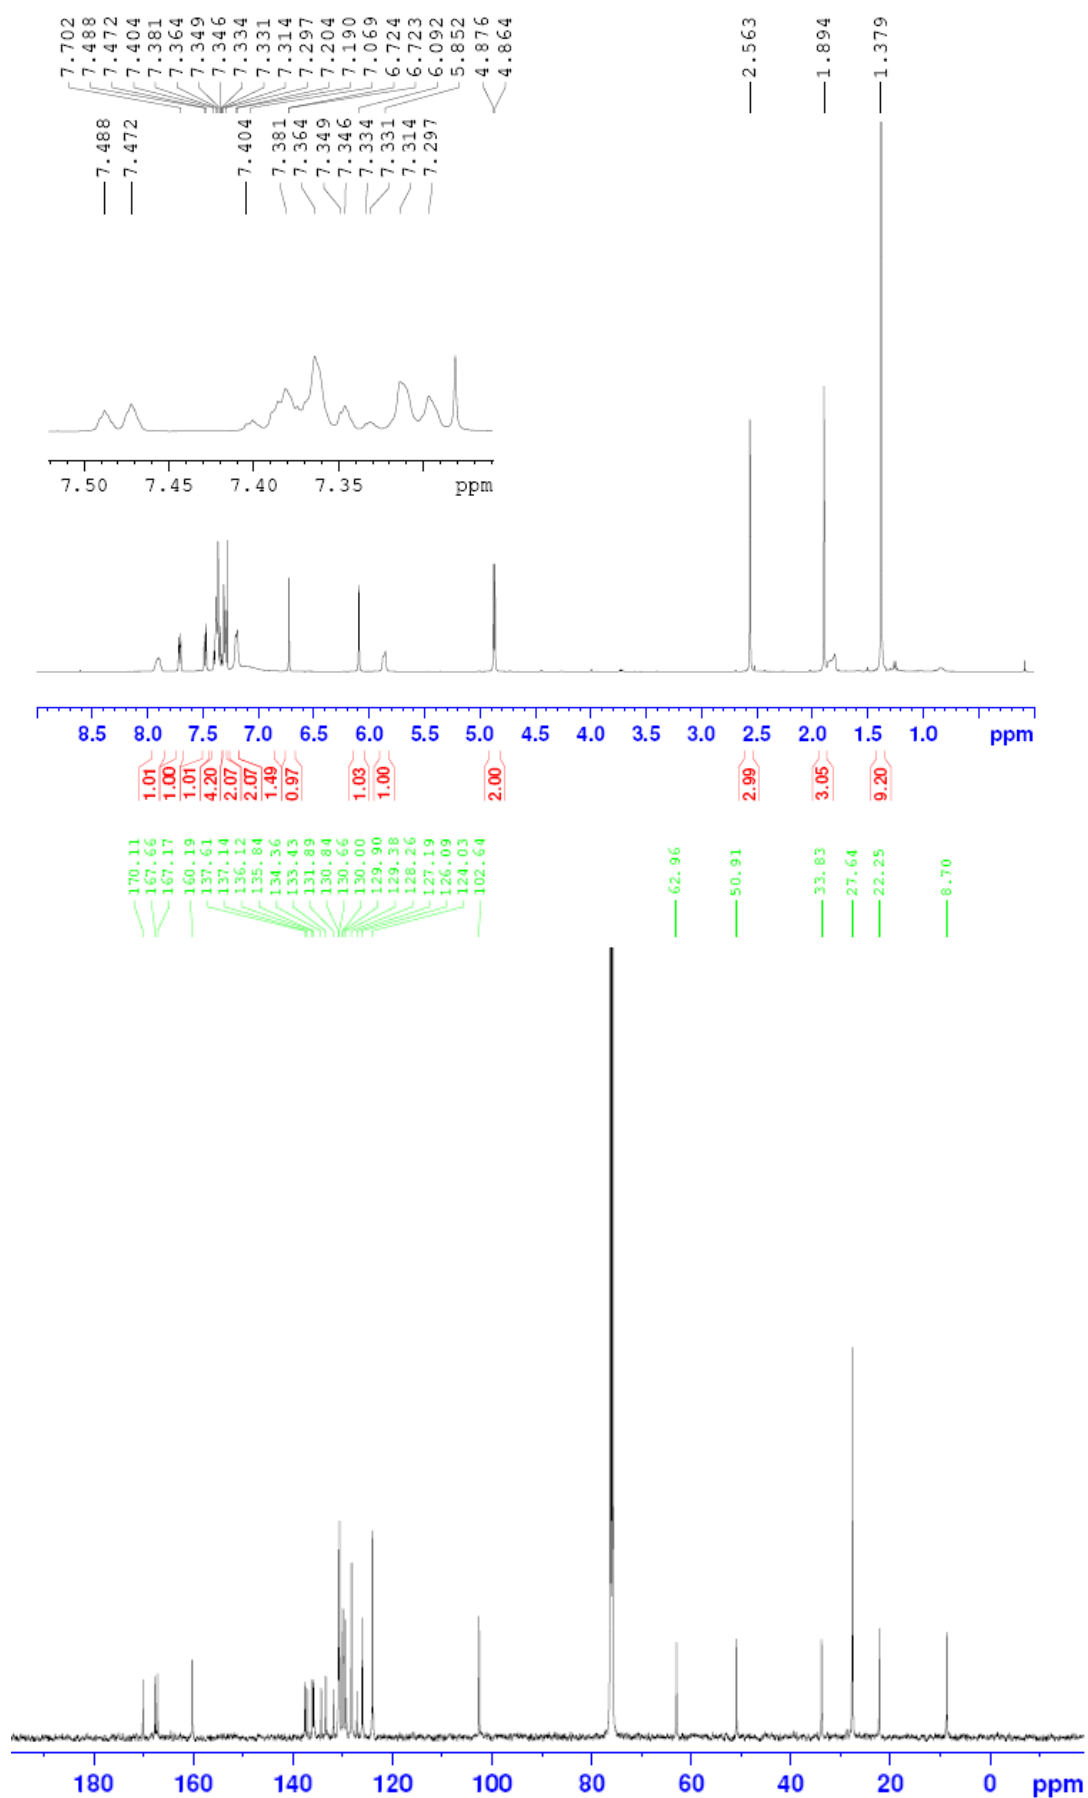

13c

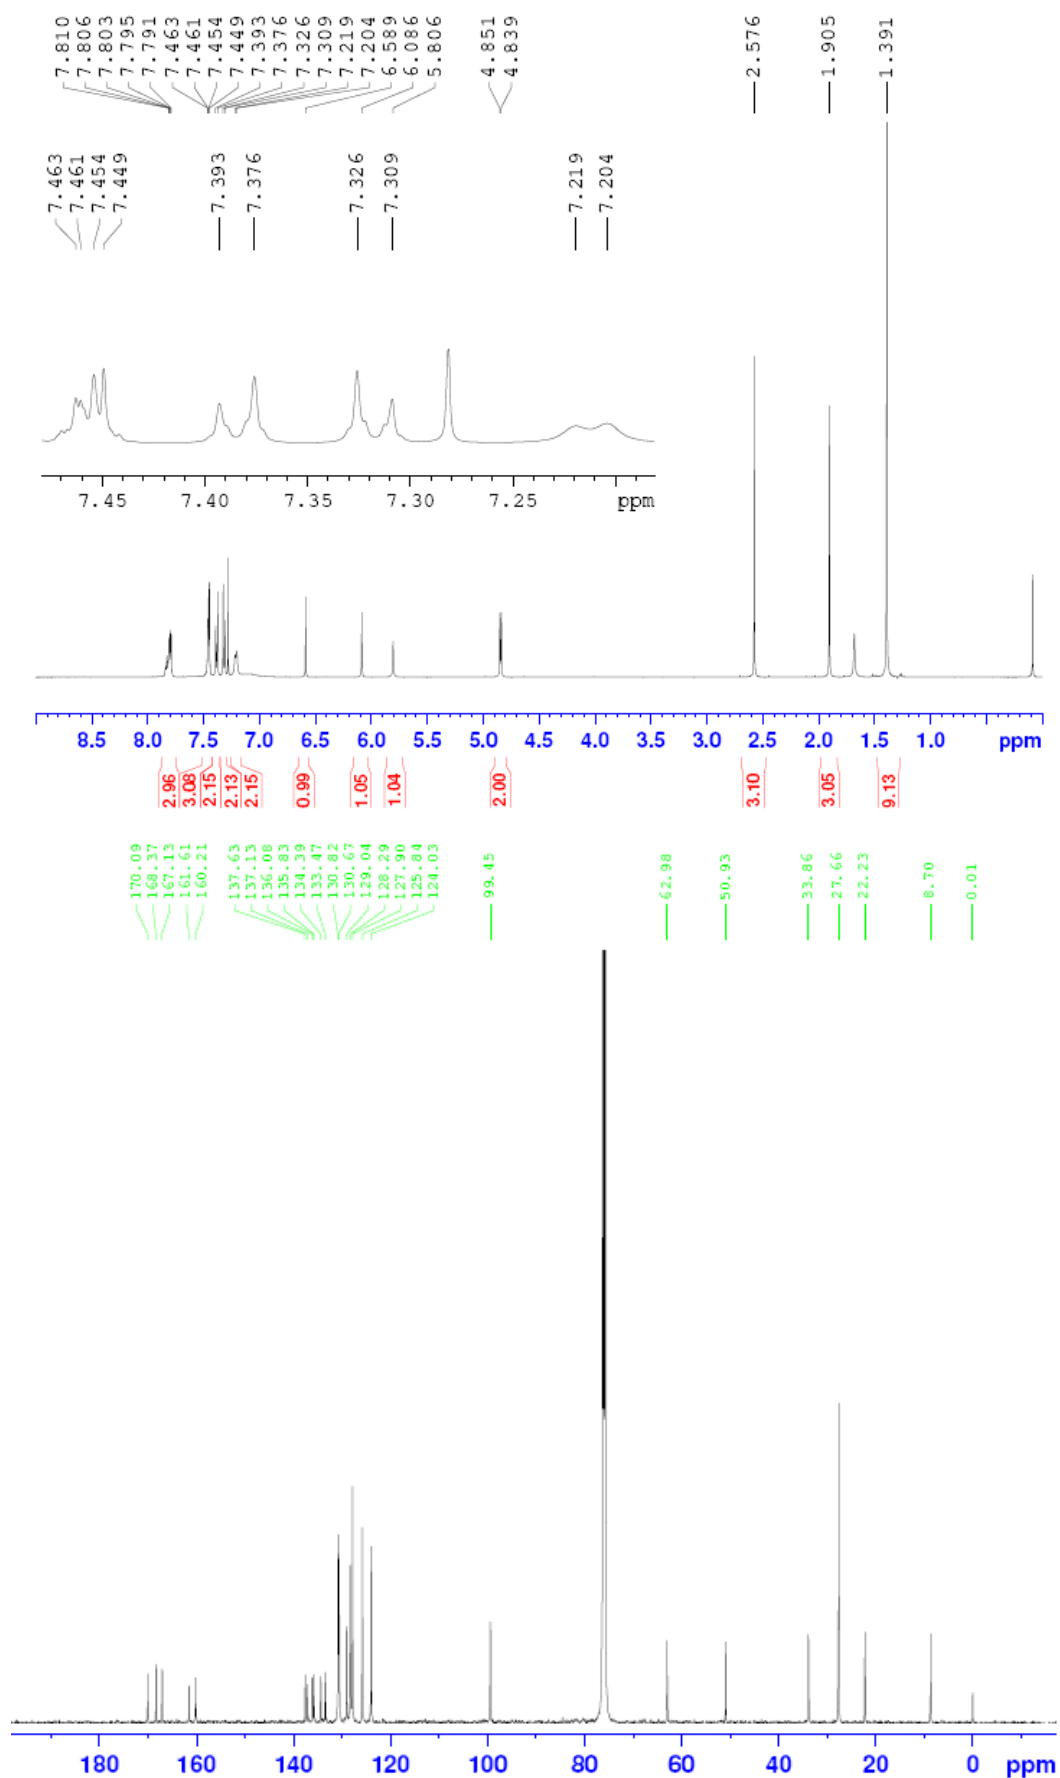

15d

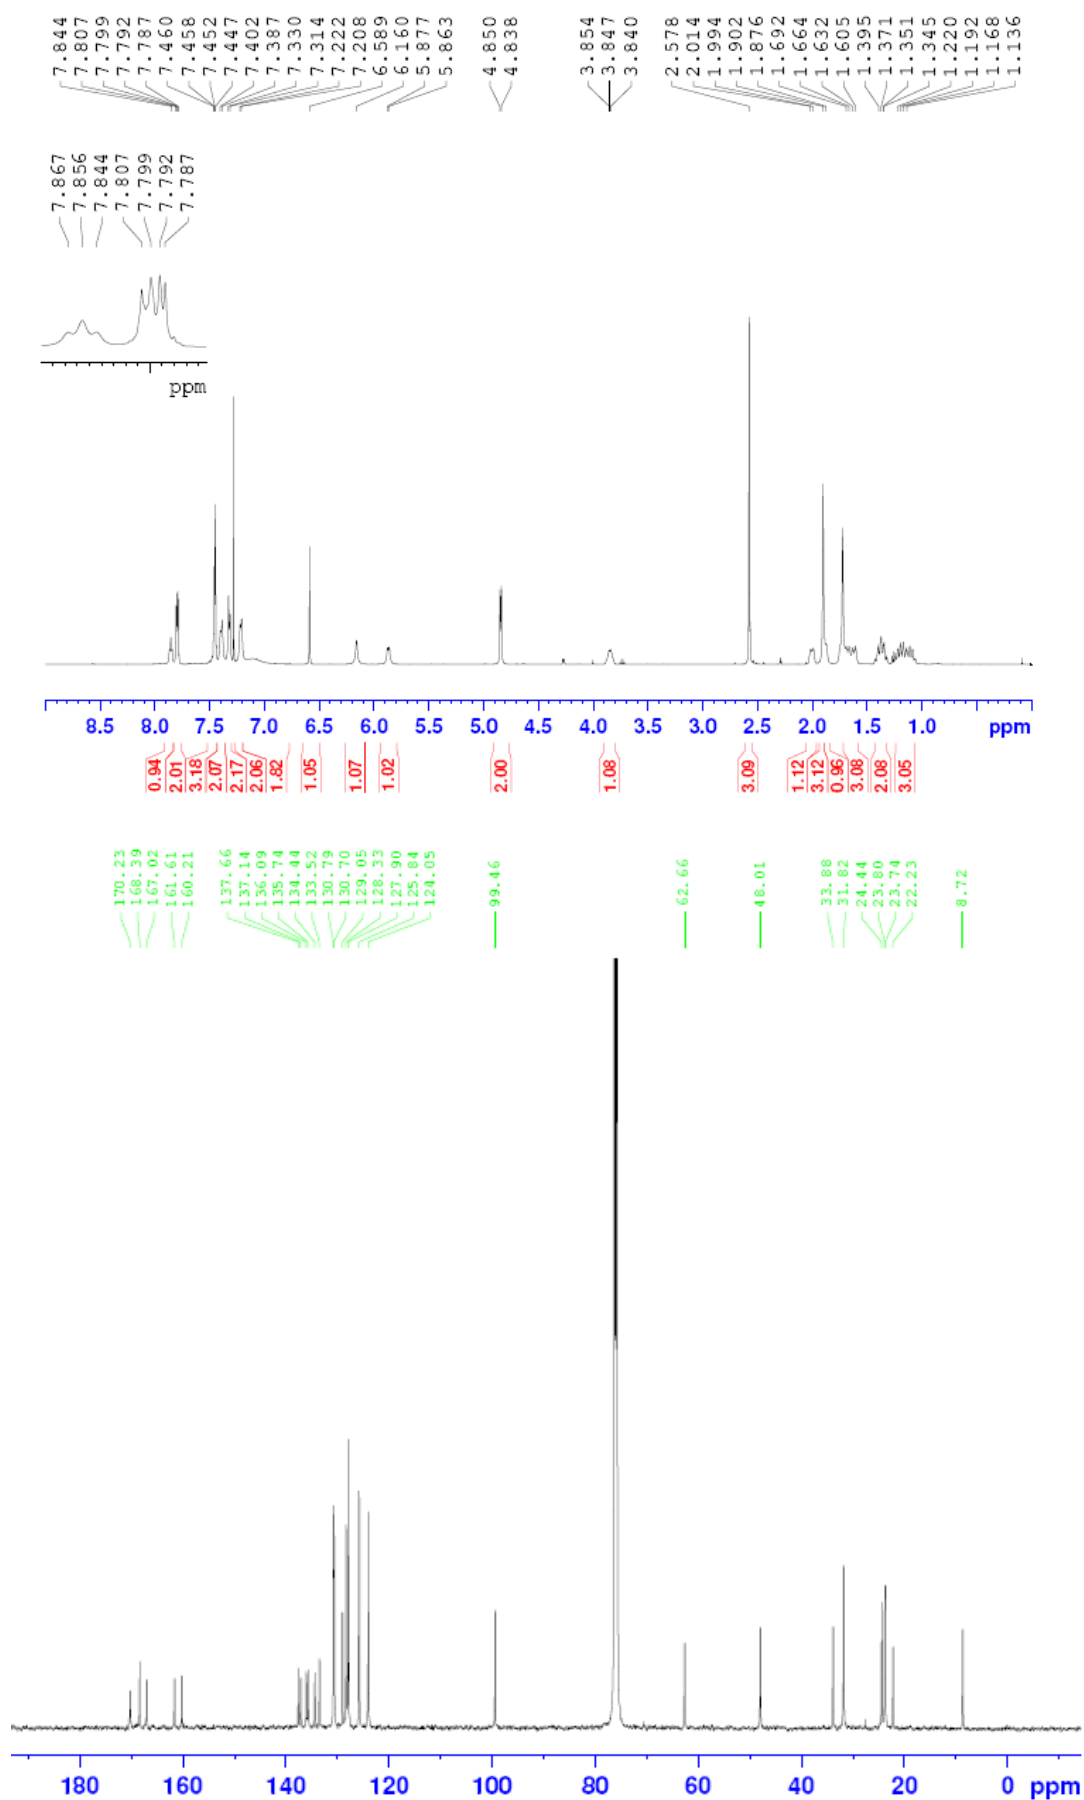

Supplement: c2ob26990b.pdf [file c2ob26990b.pdf]
